# Supplementary material for: Validation of picogram- and femtogram-input DNA libraries for microscale metagenomics
Source: PubMed Central journal article supplement (PMC5036114; doi:10.7717/peerj.2486), 2016-09-22
Supplement: peerj-04-2486-s001.pdf [file peerj-04-2486-s001.pdf]

# SUPPL TABLES

**Table S1 | Composition of the microbial mock community.** The community comprises 54 bacterial and archaeal members with a GC content ranging from 28 to 70%, and relative abundances (Ab.) between 0.04 and 25%. The source (S.) is given as Australian Centre for Ecogenomics (ACE), Mircea Podar's lab (M.P), and the Commonwealth Scientific and Industrial Research Organisation (CSIRO).

| ID | Organism                                              | NCBI Reference          | S.    | Phylum              | %GC | Ab.   | G.s.      |
|----|-------------------------------------------------------|-------------------------|-------|---------------------|-----|-------|-----------|
| 1  | <i>Escherichia coli</i> str. K-12 substr. DH10B       | NC_010473               | ACE   | Proteobacteria      | 51  | 25.00 | 4,686,137 |
| 2  | <i>Burkholderia</i> sp. A2                            | SAMN05213932            | ACE   | Proteobacteria      | 67  | 20.00 | 7,510,003 |
| 3  | <i>Rhizobium</i> sp.                                  | SAMN05213933            | ACE   | Proteobacteria      | 59  | 6.21  | 7,162,087 |
| 4  | <i>Acinetobacter</i> sp. YK3                          | SAMN05213934            | ACE   | Proteobacteria      | 41  | 3.30  | 3,765,384 |
| 5  | <i>Methanococcus maripaludis</i> C5                   | NC_009135.1             | M.P.  | Euryarchaeota       | 33  | 3.30  | 1,780,761 |
| 6  | <i>Methanosphaera stadtmanae</i> MCB3                 | NC_007681.1             | CSIRO | Euryarchaeota       | 28  | 2.93  | 1,556,477 |
| 7  | <i>Nanoarchaeum equitans</i> Kin4-M                   | NC_005213.1             | M.P.  | Nanoarchaeota       | 32  | 2.93  | 490,885   |
| 8  | <i>Hydrogenobaculum</i> sp. Y04AAS1                   | NC_011126.1             | M.P.  | Aquificae           | 35  | 2.29  | 1,559,514 |
| 9  | <i>Bacillus</i> str. A9                               | SAMN05225334            | ACE   | Firmicutes          | 38  | 2.29  | 5,111,925 |
| 10 | <i>Enterococcus faecalis</i> V583                     | NC_004668.1             | M.P.  | Firmicutes          | 38  | 1.82  | 3,218,031 |
| 11 | <i>Thermus thermophilus</i> HB8                       | NC_006461.1             | M.P.  | Deinococcus-Thermus | 70  | 1.82  | 1,849,742 |
| 12 | <i>Sulfitobacter</i> sp. NAS-14.1                     | NZ_AALZ00000000.1       | M.P.  | Proteobacteria      | 60  | 1.36  | 4,010,516 |
| 13 | <i>Chlorobium limicola</i> DSM 245                    | NC_010803.1             | M.P.  | Chlorobi            | 51  | 1.36  | 2,763,181 |
| 14 | <i>Methanosarcina</i> sp. A14                         | this study              | CSIRO | Euryarchaeota       | 39  | 1.28  | 4,275,962 |
| 15 | <i>Chlorobium tepidum</i> TLS                         | NC_002932.3             | M.P.  | Chlorobi            | 57  | 1.28  | 2,154,946 |
| 16 | <i>Chlorobium phaeobacteroides</i> DSM 266            | NC_008639.1             | M.P.  | Chlorobi            | 48  | 1.19  | 3,133,902 |
| 17 | <i>Nitrosomonas europaea</i> ATCC 19718               | NC_004757.1             | M.P.  | Proteobacteria      | 51  | 1.19  | 2,812,094 |
| 18 | <i>Archaeoglobus fulgidus</i> DSM 4304                | NC_000917.1             | M.P.  | Euryarchaeota       | 49  | 1.09  | 2,178,400 |
| 19 | <i>Herpetosiphon aurantiacus</i> ATCC 23779           | NC_009972.1             | M.P.  | Chloroflexi         | 51  | 1.09  | 6,346,587 |
| 20 | <i>Thermoanaerobacter pseudethanolicus</i> ATCC 33223 | NC_010321.1             | M.P.  | Firmicutes          | 35  | 0.98  | 2,362,816 |
| 21 | <i>Pyrobaculum calidifontis</i> JCM 11548             | NC_009073.1             | M.P.  | Crenarchaeota       | 57  | 0.98  | 2,009,313 |
| 22 | <i>Pyrobaculum aerophilum</i> str. IM2                | NC_003364.1             | M.P.  | Crenarchaeota       | 51  | 0.89  | 2,222,430 |
| 23 | <i>Thermotoga petrophila</i> RKU-1                    | NC_009486.1             | M.P.  | Thermotogae         | 46  | 0.89  | 1,823,511 |
| 24 | <i>Thermotoga neapolitana</i> DSM 4359                | NC_011978.1             | M.P.  | Thermotogae         | 47  | 0.88  | 1,884,562 |
| 25 | <i>Deinococcus radiodurans</i> R1                     | NC_001263.1             | M.P.  | Deinococcus-Thermus | 67  | 0.88  | 3,060,986 |
| 26 | <i>Persephonella marina</i> EX-H1                     | NC_012440.1             | M.P.  | Aquificae           | 37  | 0.82  | 1,930,284 |
| 27 | <i>Methanobrevibacter</i> sp. A27                     | SAMN05224565            | CSIRO | Euryarchaeota       | 51  | 0.82  | 1,809,869 |
| 28 | <i>Salinispora tropica</i> CNB-440                    | NC_009380.1             | M.P.  | Actinobacteria      | 69  | 0.79  | 5,183,331 |
| 29 | <i>Bacteroides vulgatus</i> ATCC 8482                 | NC_009614.1             | M.P.  | Bacteroidetes       | 42  | 0.79  | 5,163,189 |
| 30 | <i>Treponema denticola</i>                            | NC_002967.9             | M.P.  | Spirochaetes        | 38  | 0.70  | 2,843,201 |
| 31 | <i>Geobacter sulfurreducens</i> PCA                   | NC_002939.5             | M.P.  | Proteobacteria      | 61  | 0.70  | 3,814,128 |
| 32 | <i>Caldicellulosiruptor bescii</i> DSM 6725           | NC_012034.1             | M.P.  | Firmicutes          | 35  | 0.63  | 2,919,718 |
| 33 | <i>Chlorobium phaeovibrioides</i> DSM 265             | NC_009337.1             | M.P.  | Chlorobi            | 32  | 0.63  | 1,966,858 |
| 34 | <i>Clostridium thermocellum</i> ATCC 27405            | NC_009012.1             | M.P.  | Firmicutes          | 39  | 0.52  | 3,843,301 |
| 35 | <i>Sulfurihydrogenibium</i> sp. YO3AOP1               | NC_010730.1             | M.P.  | Aquificae           | 32  | 0.52  | 1,838,442 |
| 36 | <i>Shewanella baltica</i> OS185                       | NC_009665.1             | M.P.  | Proteobacteria      | 46  | 0.45  | 5,229,686 |
| 37 | <i>Salinispora arenicola</i> CNS-205                  | NC_009953.1             | M.P.  | Actinobacteria      | 70  | 0.45  | 5,786,361 |
| 38 | <i>Porphyromonas gingivalis</i> ATCC 33277            | NC_010729.1             | M.P.  | Bacteroidetes       | 48  | 0.44  | 2,354,886 |
| 39 | <i>Methanobacterium</i> sp. A39                       | SAMN05224566            | CSIRO | Euryarchaeota       | 33  | 0.44  | 3,329,516 |
| 40 | <i>Sulfolobus tokodaii</i> str. 7                     | NC_003106.2             | M.P.  | Crenarchaeota       | 33  | 0.41  | 2,694,756 |
| 41 | <i>Pyrococcus horikoshii</i> OT3                      | NC_000961.1             | M.P.  | Euryarchaeota       | 42  | 0.41  | 1,738,505 |
| 42 | <i>Bordetella bronchiseptica</i> RB50                 | NC_002927.3             | M.P.  | Proteobacteria      | 68  | 0.41  | 5,339,179 |
| 43 | <i>Gemmatimonas aurantiaca</i> T-27                   | NC_012489.1             | M.P.  | Gemmatimonadetes    | 64  | 0.41  | 4,636,964 |
| 44 | <i>Methanocaldococcus jannaschii</i> DSM 2661         | NC_000909.1             | M.P.  | Euryarchaeota       | 31  | 0.32  | 1,664,970 |
| 45 | <i>Chloroflexus aurantiacus</i> J-10-fl               | NC_010175.1             | M.P.  | Chloroflexi         | 57  | 0.32  | 5,258,541 |
| 46 | <i>Bacteroides thetaiotaomicron</i> VPI-5482          | AE015928.1              | M.P.  | Bacteroidetes       | 43  | 0.30  | 6,260,361 |
| 47 | <i>Rhodopirellula baltica</i> SH 1                    | NC_005027.1             | M.P.  | Planctomycetes      | 55  | 0.30  | 7,145,576 |
| 48 | <i>Methanopyrus kandleri</i> AV19                     | NC_003551.1             | M.P.  | Euryarchaeota       | 61  | 0.25  | 1,694,969 |
| 49 | <i>Nostoc</i> sp. PCC 7120                            | NC_003272.1             | M.P.  | Cyanobacteria       | 41  | 0.25  | 6,413,771 |
| 50 | <i>Bacillus cereus</i> str. A50                       | SAMN05231870            | CSIRO | Firmicutes          | 38  | 0.22  | 5,372,944 |
| 52 | <i>Burkholderia xenovorans</i> LB400                  | NC_007951.1,NC_007952.1 | M.P.  | Proteobacteria      | 63  | 0.10  | 9,731,138 |
| 53 | <i>Acidobacterium capsulatum</i> ATCC 51196           | NC_012483.1             | M.P.  | Acidobacteria       | 61  | 0.10  | 4,127,356 |
| 54 | <i>Methanobrevibacter smithii</i> PS                  | NC_009515.1             | CSIRO | Euryarchaeota       | 31  | 0.04  | 1,712,240 |
| 55 | <i>Leptothrix cholodnii</i> SP-6                      | NC_010524.1             | M.P.  | Proteobacteria      | 69  | 0.04  | 4,909,403 |

**Table S2. | Analysis of Variance and post-hoc tests. Correlations of mock community member abundances.** ANOVA (Analysis of Variance) was performed with MYSTAT and the post-hoc test with SYSTAT. All stats include the 1ng SOP (variable 1) and all low input libraries (100pg, 10pg, 1pg, 100fg; variable 2 to 5) of the mock community as shown in Fig. 2. **(a)** insert size distribution, **(b)** GC-content. Per definition, a significant p-value (<0.05) indicates that the samples are correlated.

**(a) Analysis of Variance**

| Source | Type III SS | df | Mean Squares | F-ratio | p-value |
|--------|-------------|----|--------------|---------|---------|
| VAR_1  | 22,832.356  | 4  | 5,708.089    | 5.445   | 0.010   |
| Error  | 12,579.147  | 12 | 1,048.262    |         |         |

**Tukey's Honestly-Significant-Difference Test**

| VAR_2(i) | VAR_2(j) | Difference     | p-value      | 95.0% Confidence Interval |                |
|----------|----------|----------------|--------------|---------------------------|----------------|
|          |          |                |              | Lower                     | Upper          |
| 1        | 2        | 50.133         | 0.369        | -34.130                   | 134.396        |
| 1        | 3        | 53.633         | 0.310        | -30.630                   | 137.896        |
| <b>1</b> | <b>4</b> | <b>88.633</b>  | <b>0.038</b> | <b>4.370</b>              | <b>172.896</b> |
| <b>1</b> | <b>5</b> | <b>103.567</b> | 0.007        | 28.200                    | 178.934        |
| 2        | 3        | 3.500          | 1.000        | -80.763                   | 87.763         |
| 2        | 4        | 38.500         | 0.606        | -45.763                   | 122.763        |
| 2        | 5        | 53.433         | 0.223        | -21.934                   | 128.800        |
| 3        | 4        | 35.000         | 0.683        | -49.263                   | 119.263        |
| 3        | 5        | 49.933         | 0.276        | -25.434                   | 125.300        |
| 4        | 5        | 14.933         | 0.967        | -60.434                   | 90.300         |

**(b) Analysis of Variance**

| Source | Type III SS | df | Mean Squares | F-ratio | p-value |
|--------|-------------|----|--------------|---------|---------|
| VAR_1  | 54.462      | 4  | 13.615       | 3.466   | 0.050   |
| Error  | 39.287      | 10 | 3.929        |         |         |

**Table S3. | Correlations of mock community member abundances.** The Pearson correlation coefficient and the Bonferroni probability (p-value) is shown comparing the 1ng SOP and all low input libraries of the mock community. **(a)** Data set (LIB) including all 54 mock community members, **(b)** data set (LOWAB) excluding the 10 most abundant community members. The correlations and the probability analysis are based on the average relative abundances of all libraries except for one 100fg (re3) which showed a high level of contamination and was therefore excluded, leaving 4 replicates (N4) for the 100 fg libraries.

**(a)** Pearson Correlation Matrix

|              | LIB_1NG | LIB_100PG | LIB_10PG | LIB_1PG | LIB_100FG_N4 |
|--------------|---------|-----------|----------|---------|--------------|
| LIB_1NG      | 1.000   |           |          |         |              |
| LIB_100PG    | 0.996   | 1.000     |          |         |              |
| LIB_10PG     | 0.975   | 0.988     | 1.000    |         |              |
| LIB_1PG      | 0.994   | 0.998     | 0.992    | 1.000   |              |
| LIB_100FG_N4 | 0.971   | 0.984     | 0.999    | 0.991   | 1.000        |

Matrix of Bonferroni Probabilities

|              | LIB_1NG | LIB_100PG | LIB_10PG | LIB_1PG | LIB_100FG_N4 |
|--------------|---------|-----------|----------|---------|--------------|
| LIB_1NG      | 0.000   |           |          |         |              |
| LIB_100PG    | 0.000   | 0.000     |          |         |              |
| LIB_10PG     | 0.000   | 0.000     | 0.000    |         |              |
| LIB_1PG      | 0.000   | 0.000     | 0.000    | 0.000   |              |
| LIB_100FG_N4 | 0.000   | 0.000     | 0.000    | 0.000   | 0.000        |

**(b)** Pearson Correlation Matrix

|                | LOWAB_1NG | LOWAB_100PG | LOWAB_10PG | LOWAB_1PG | LOWAB_100FG_N4 |
|----------------|-----------|-------------|------------|-----------|----------------|
| LOWAB_1NG      | 1.000     |             |            |           |                |
| LOWAB_100PG    | 0.969     | 1.000       |            |           |                |
| LOWAB_10PG     | 0.946     | 0.943       | 1.000      |           |                |
| LOWAB_1PG      | 0.909     | 0.873       | 0.934      | 1.000     |                |
| LOWAB_100FG_N4 | 0.846     | 0.803       | 0.923      | 0.959     | 1.000          |

Matrix of Bonferroni Probabilities

|                | LOWAB_1NG | LOWAB_100PG | LOWAB_10PG | LOWAB_1PG | LOWAB_100FG_N4 |
|----------------|-----------|-------------|------------|-----------|----------------|
| LOWAB_1NG      | 0.000     |             |            |           |                |
| LOWAB_100PG    | 0.000     | 0.000       |            |           |                |
| LOWAB_10PG     | 0.000     | 0.000       | 0.000      |           |                |
| LOWAB_1PG      | 0.000     | 0.000       | 0.000      | 0.000     |                |
| LOWAB_100FG_N4 | 0.000     | 0.000       | 0.000      | 0.000     | 0.000          |

**Table S4 | Comparison of low, medium and high %GC organisms between libraries.** The K-S test for normality showed that the data distribution is significantly different from a normal distribution, thus the non-parametric Kruskal-Wallis One-way Analysis of Variance was applied. Each data set included the groups SOP, 100pg, 10pg, 1pg, and 100fg. The observed p-values are not significant ( $>0.05$ ). Per definition, p-values  $<0.05$  would indicate that the samples are significantly different.

| data set             | n per group | p-value |
|----------------------|-------------|---------|
| low %GC organisms    | 19          | 0.855   |
| medium %GC organisms | 23          | 0.940   |
| high %GC organisms   | 12          | 0.449   |

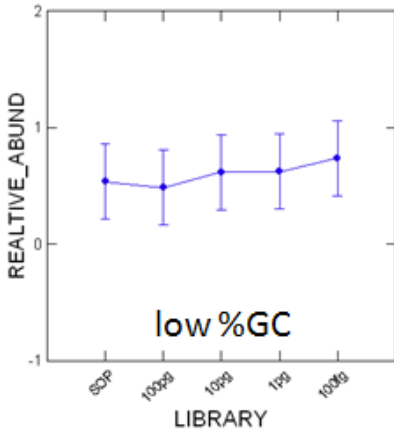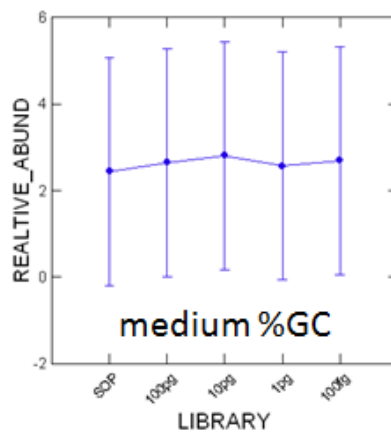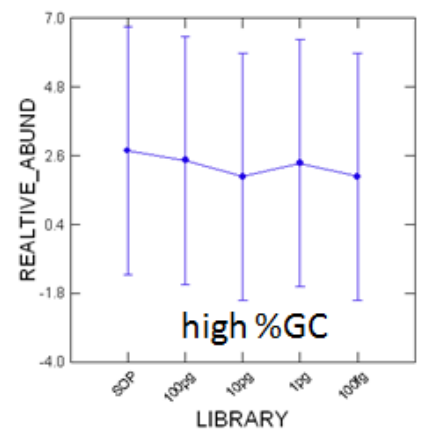



# SUPPL FIGURES

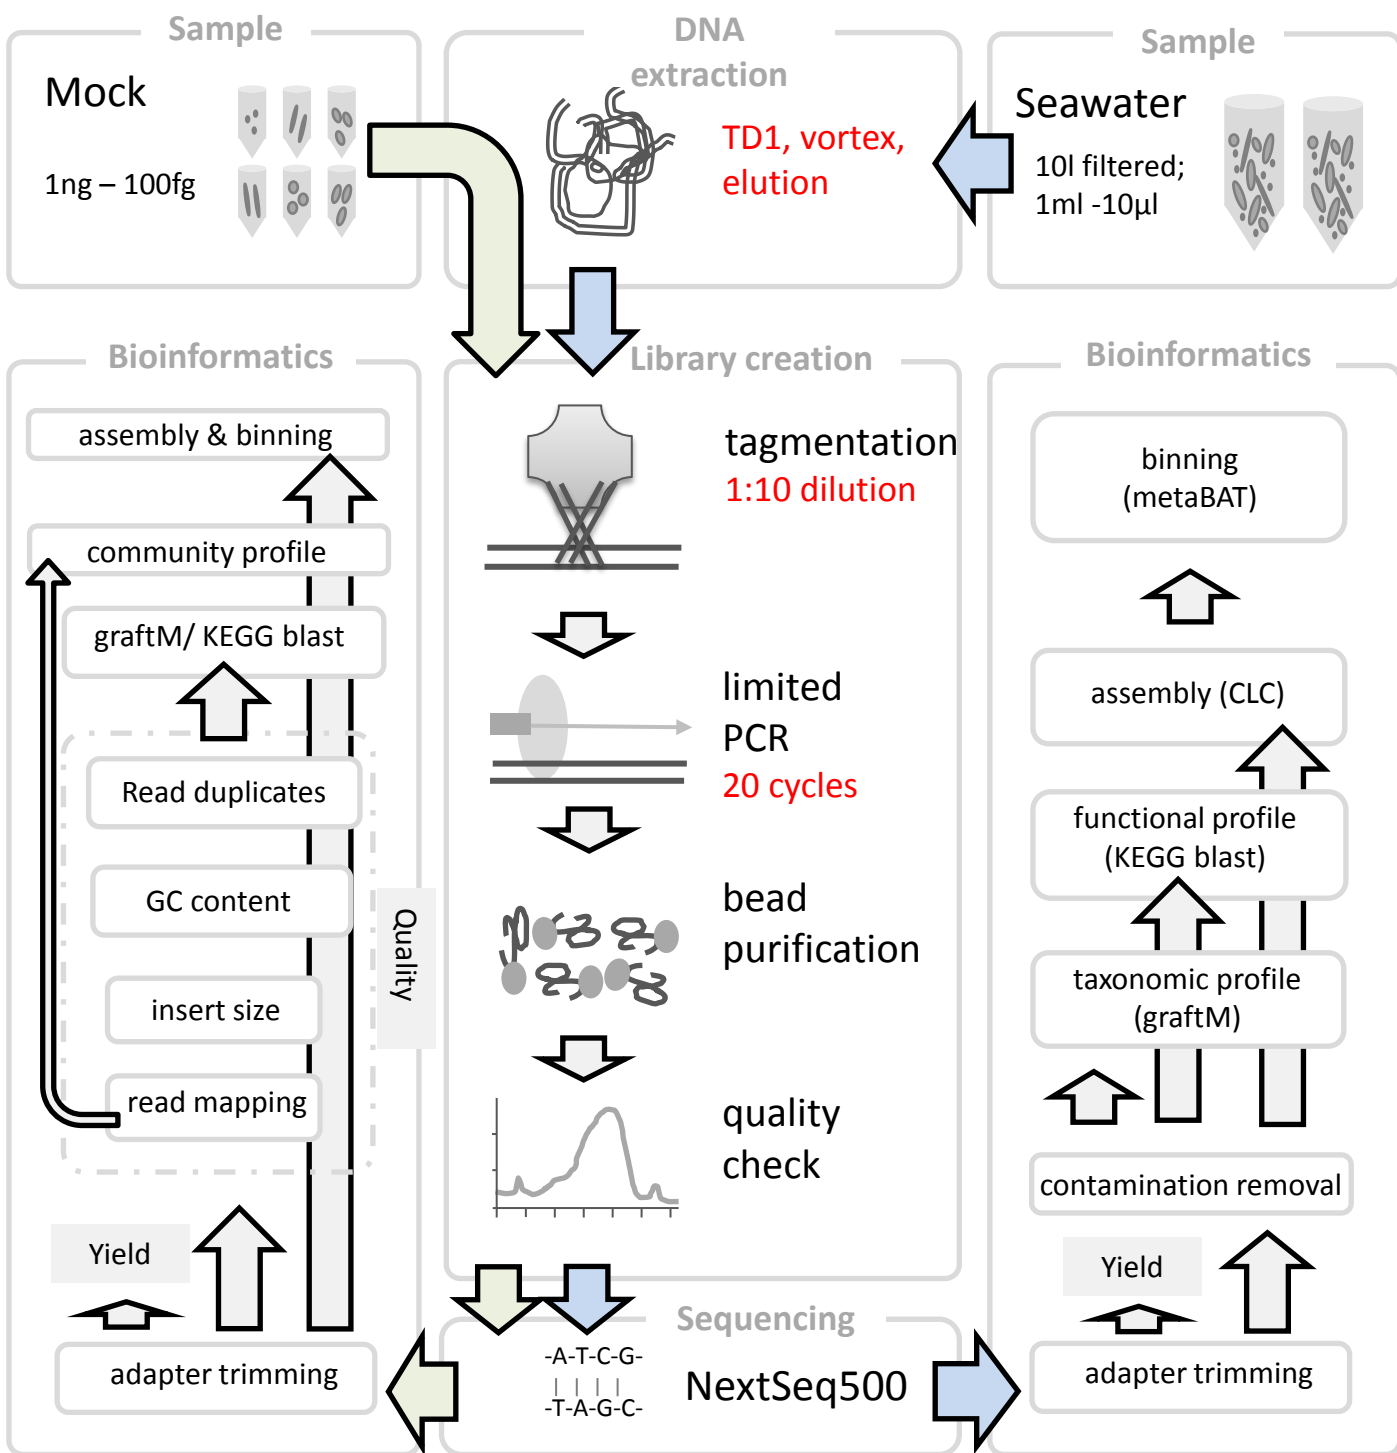

**Figure S1 | Sample preparation and analysis workflow with key changes to standard methodology highlighted in red.** Mock community samples were obtained as genomic DNA. The DNA extraction of seawater samples was performed according to the manufacturer's protocol (UltraClean® Tissue & Cells) with three main modifications regarding the TD1 lysis solution volume, the homogenizing step, and the volume and incubation time of the elution buffer. Library creation was performed following the manufacturer's protocol (Nextera XT DNA Sample Prep Kit), except for a dilution of the tagmentation reaction (1:10), and an increase in the number of cycles in the limited PCR step (20 cycles). The mock community and seawater sample sequences were adapter trimmed and analyzed with the illustrated bioinformatic pipelines. Green arrows show the main steps for mock community samples, blue arrows show the main steps for seawater samples.



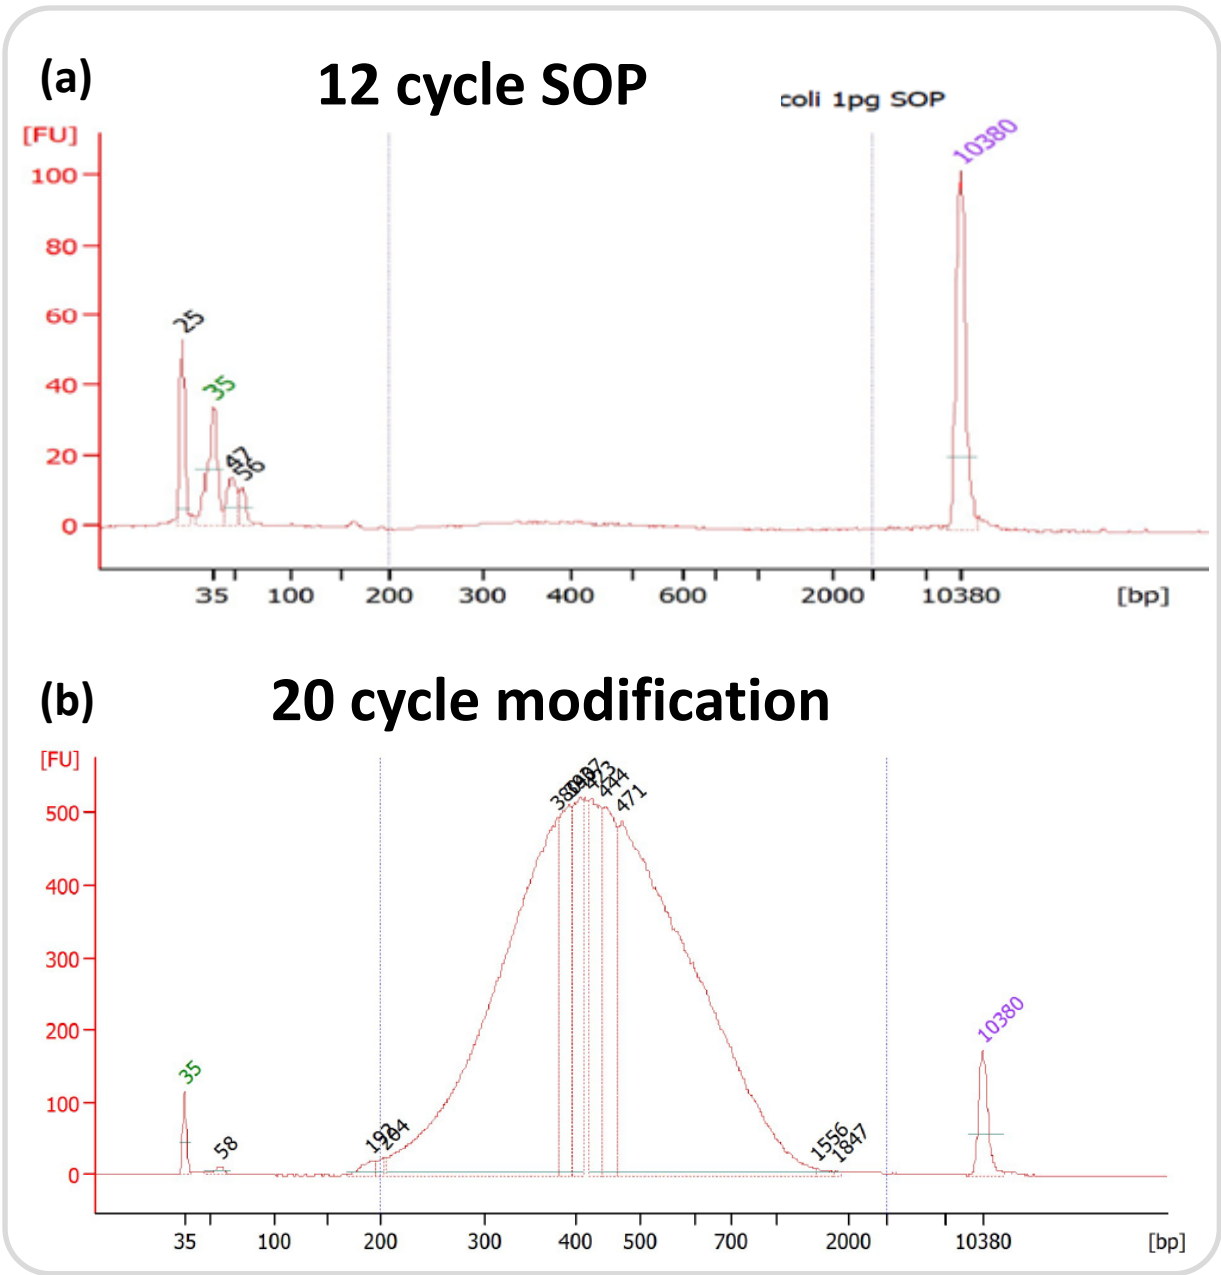

**Figure S2 | Comparison between the SOP with 12 cycles of limited cycle PCR and the modified protocol with 20 cycles, tested on 1pg *E. coli* gDNA.** The SOP (a) produced no amplification product when evaluated with the Bioanalyzer, whereas the modified 20 cycle protocol (b) yielded the desired product at an amount sufficient for further downstream analysis.

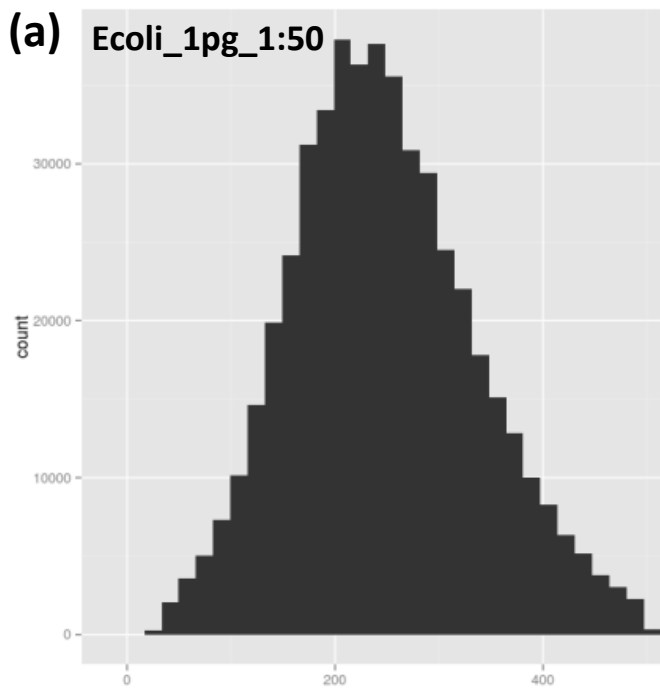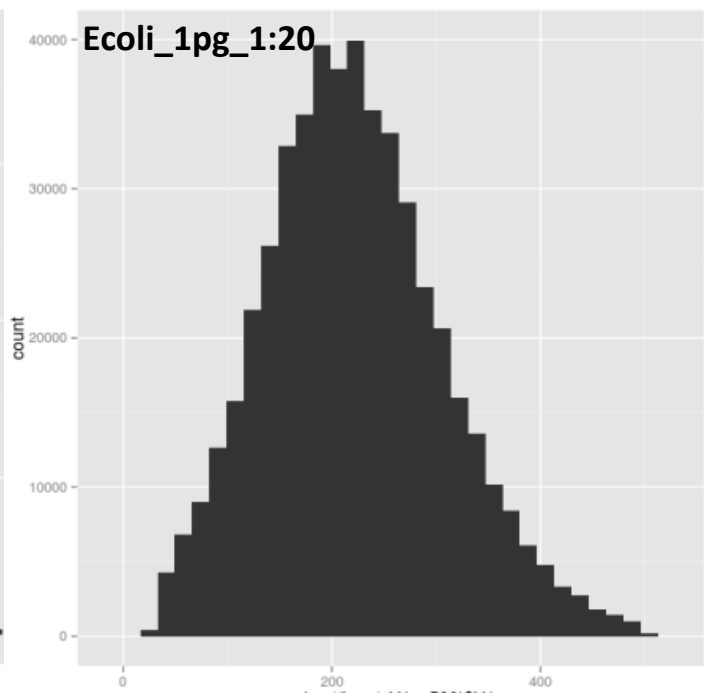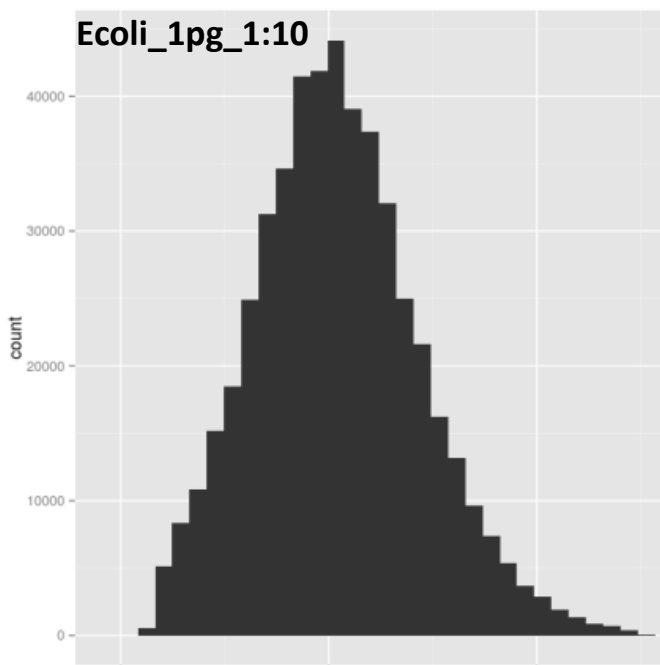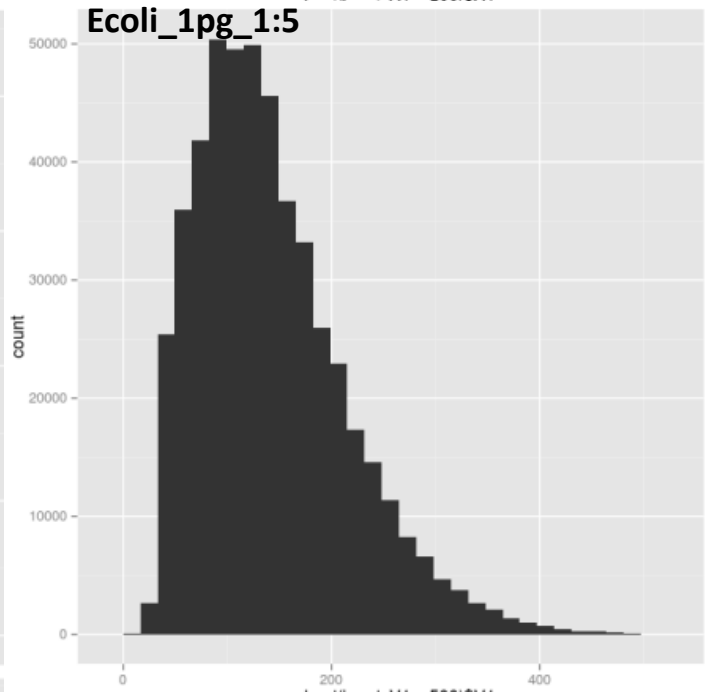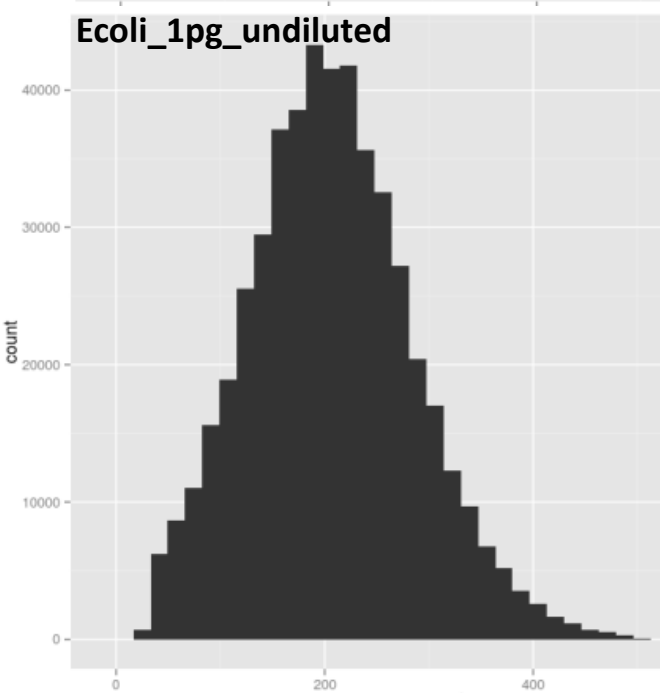

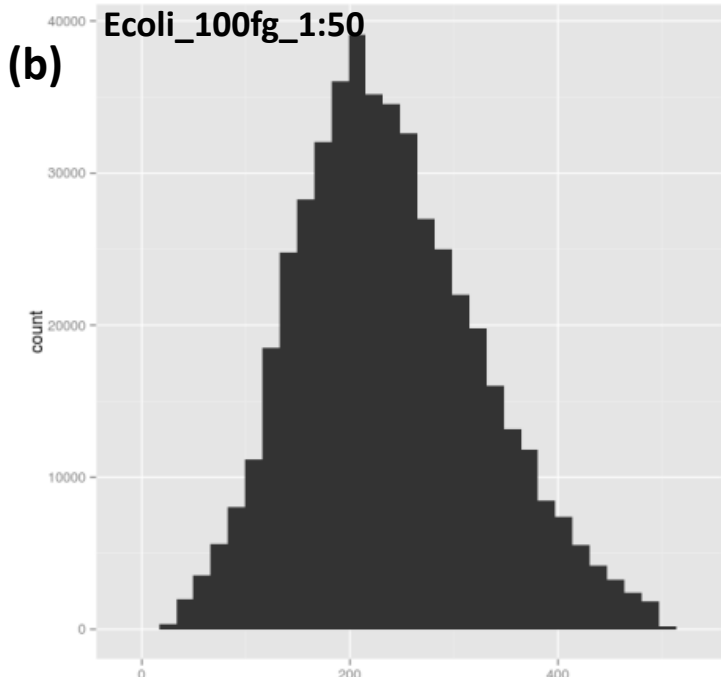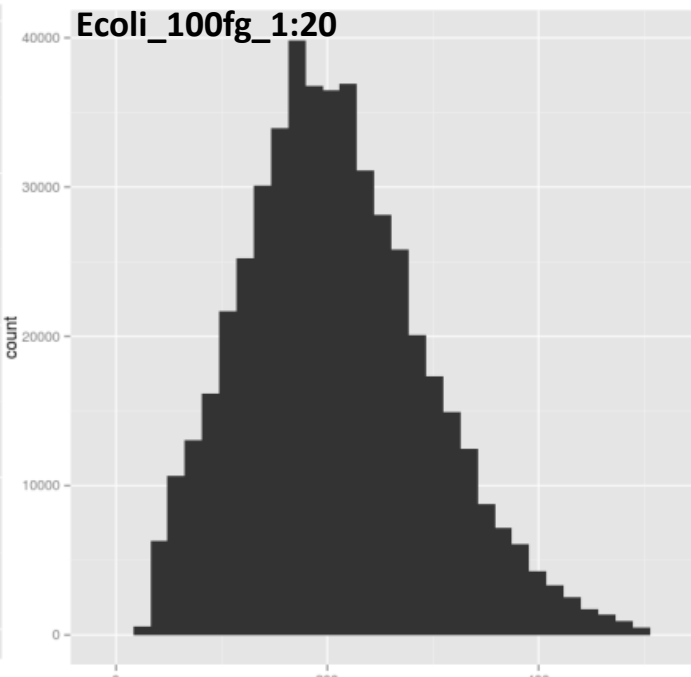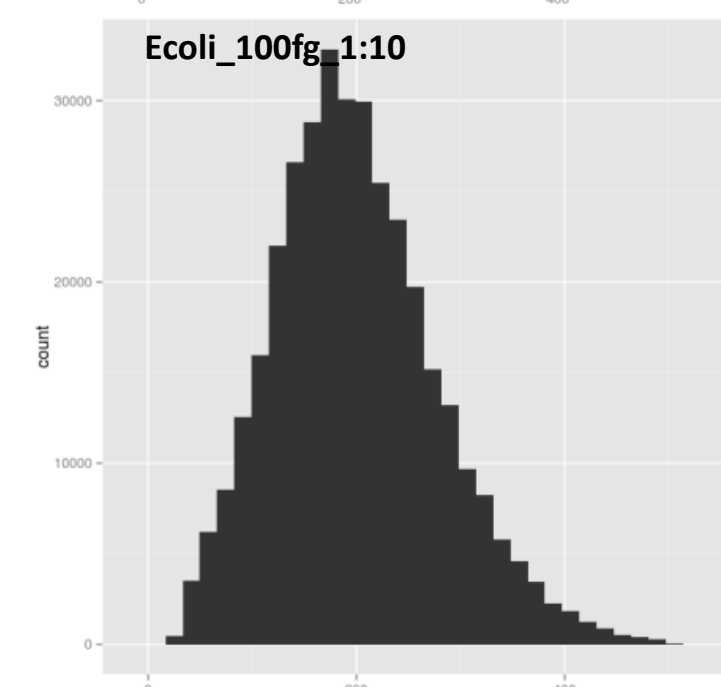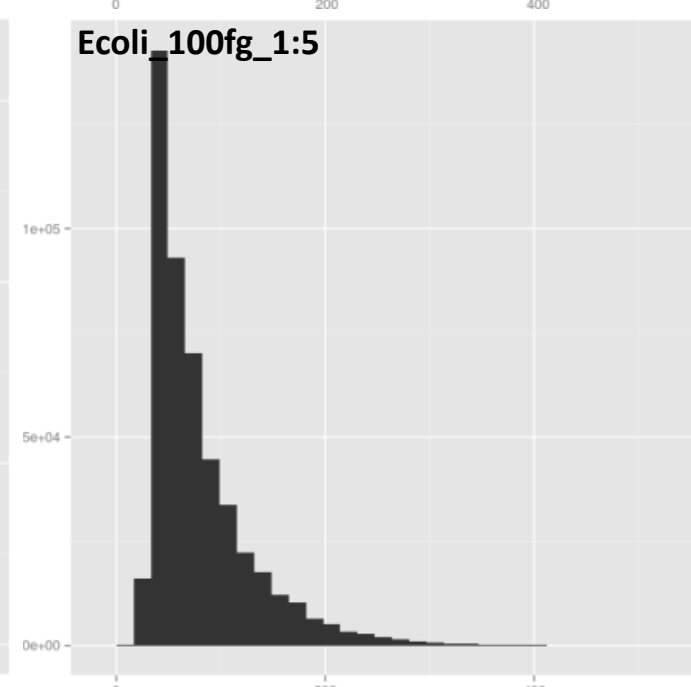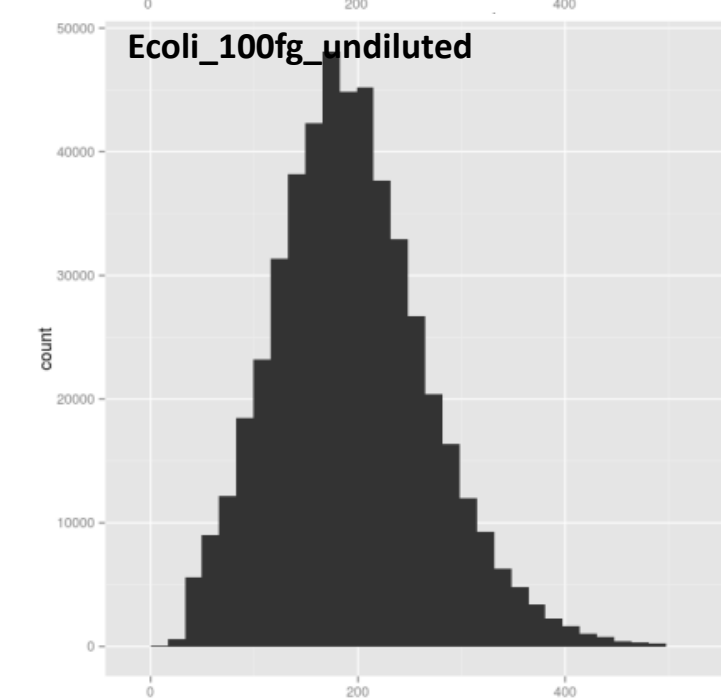

**Figure S3 | Insert size distribution of *E. coli* low input libraries, using different ATM dilutions.** Dilutions of the ATM (amplicon tagmentation mix) range from 1:50 to down to 1:5, and are compared to the undiluted ATM. (a) shows the insert size distribution for the low input DNA 1pg *E. coli* libraries and (b) for the 100fg *E. coli* libraries.

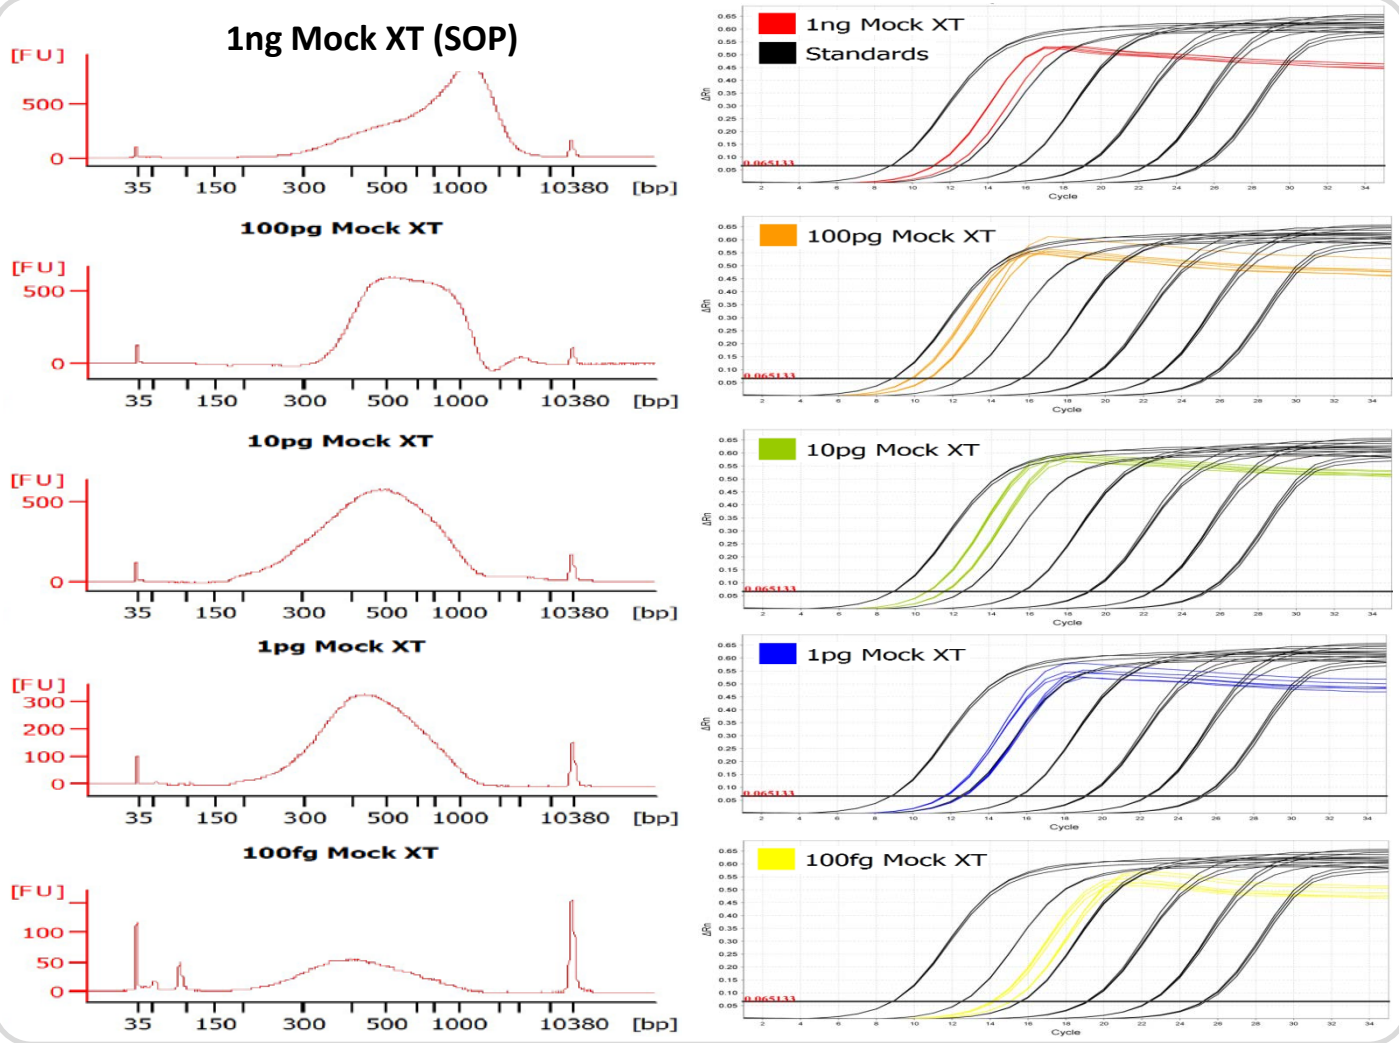

**Figure S4 | Examples of Bioanalyzer and qPCR profiles for different low input DNA concentrations. The sequencing libraries were created from the microbial mock community samples.**

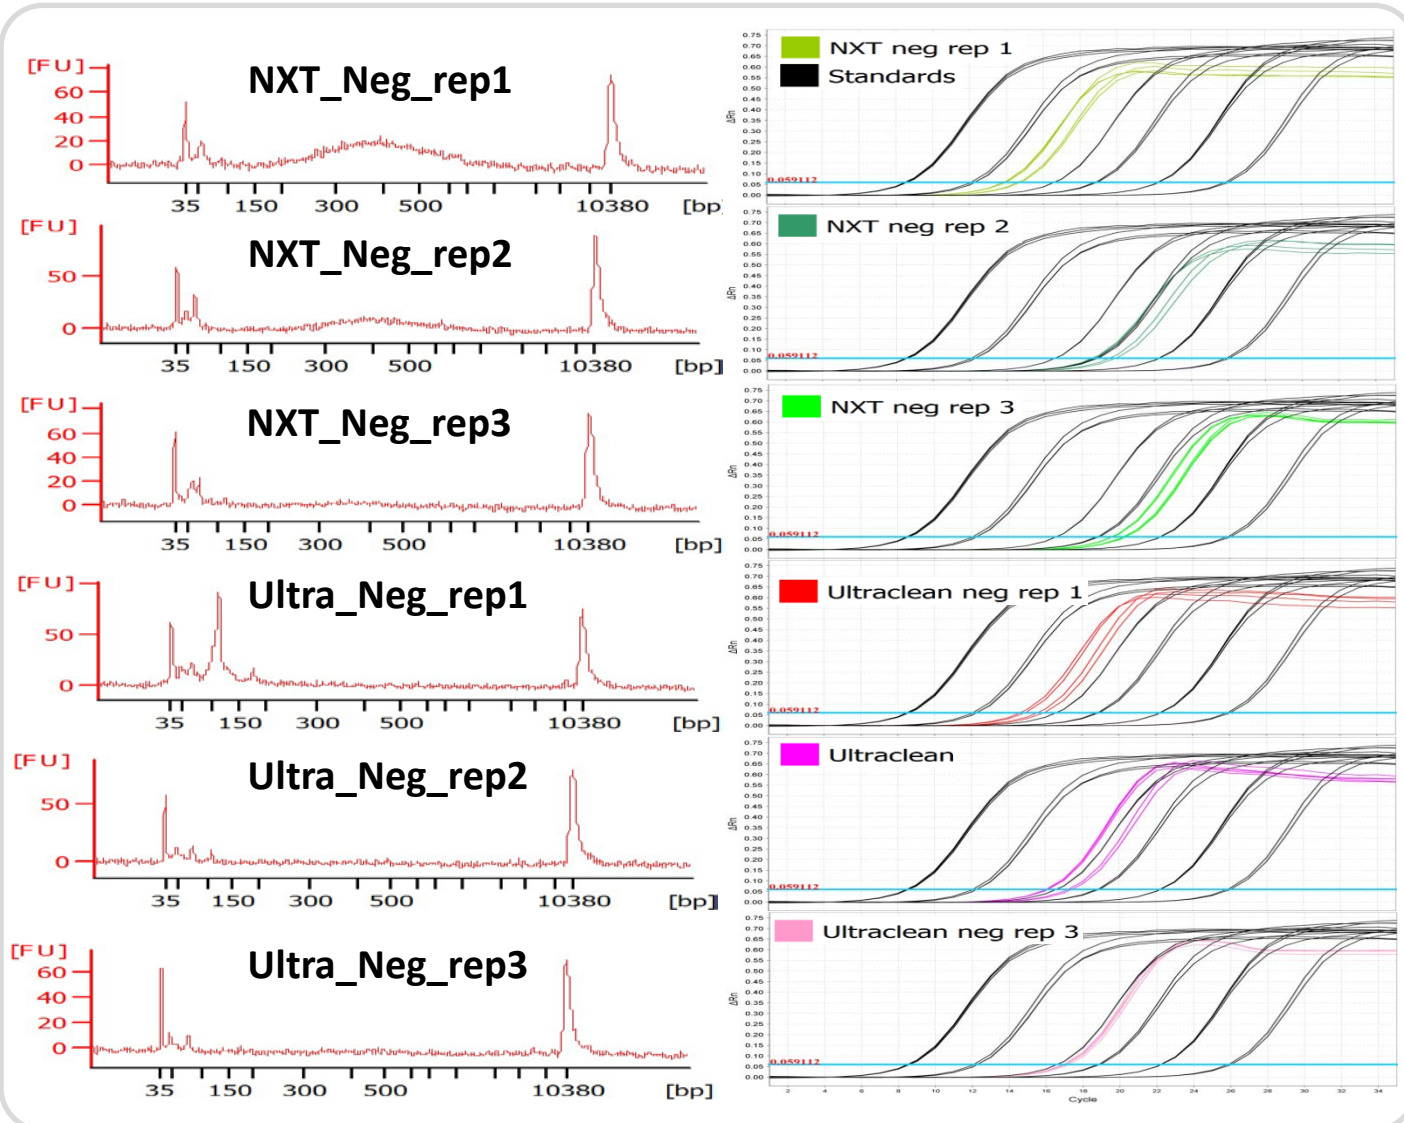

**Figure S5 | Bioanalyzer and qPCR profiles of negative controls.** Negative controls were detectable via the Bioanalyzer and/or qPCR assays and were therefore sequenced. Negative controls were carried out by substituting ddH<sub>2</sub>O for input DNA for library construction (NEXT\_Neg) and for DNA extraction followed by library construction (Ultra\_Neg).

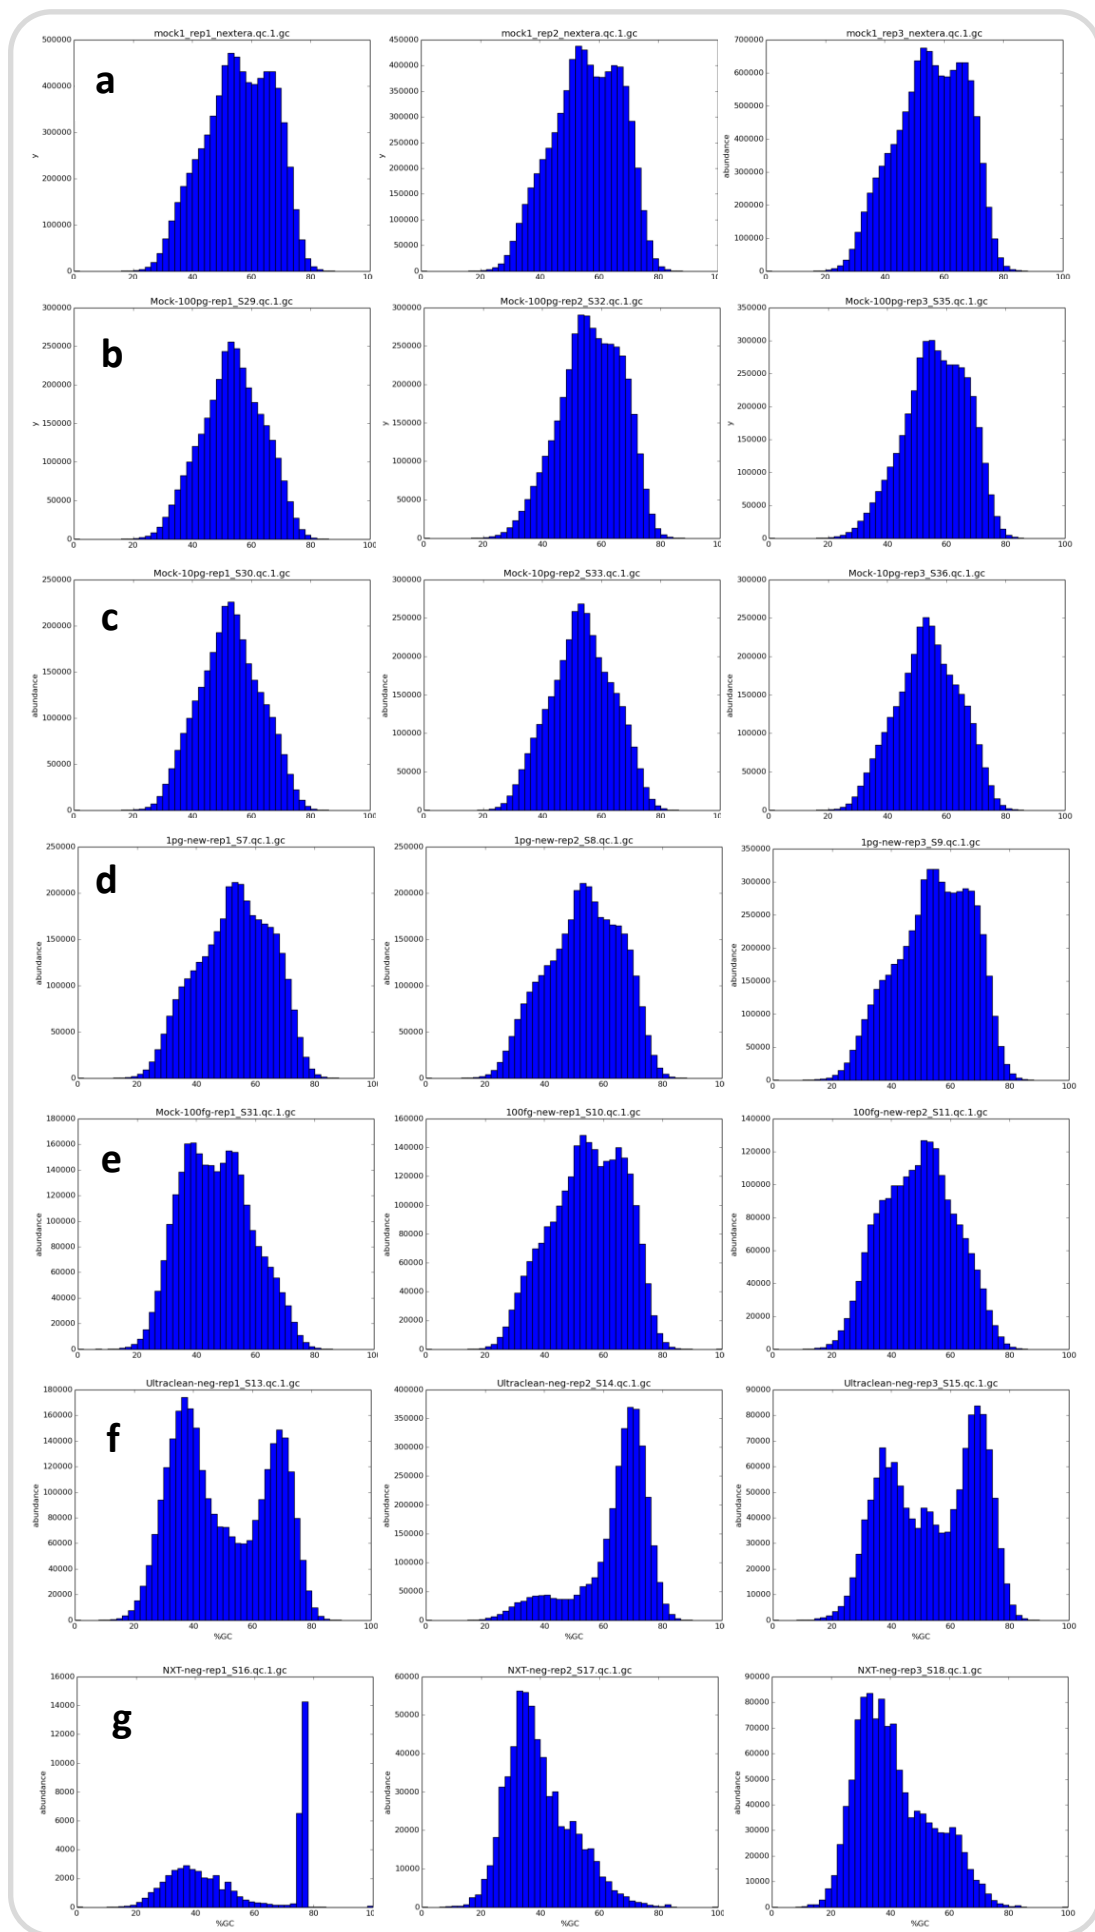

**Figure S6 | Mock community read GC content.** Shown are (a) 1ng SOP, and the low input libraries (b) 100pg, (c) 10pg, (d) 1pg, (e) 100fg, and the negative controls (f) Ultra-clean DNA extraction kit plus library preparation kit, (g) library preparation kit.

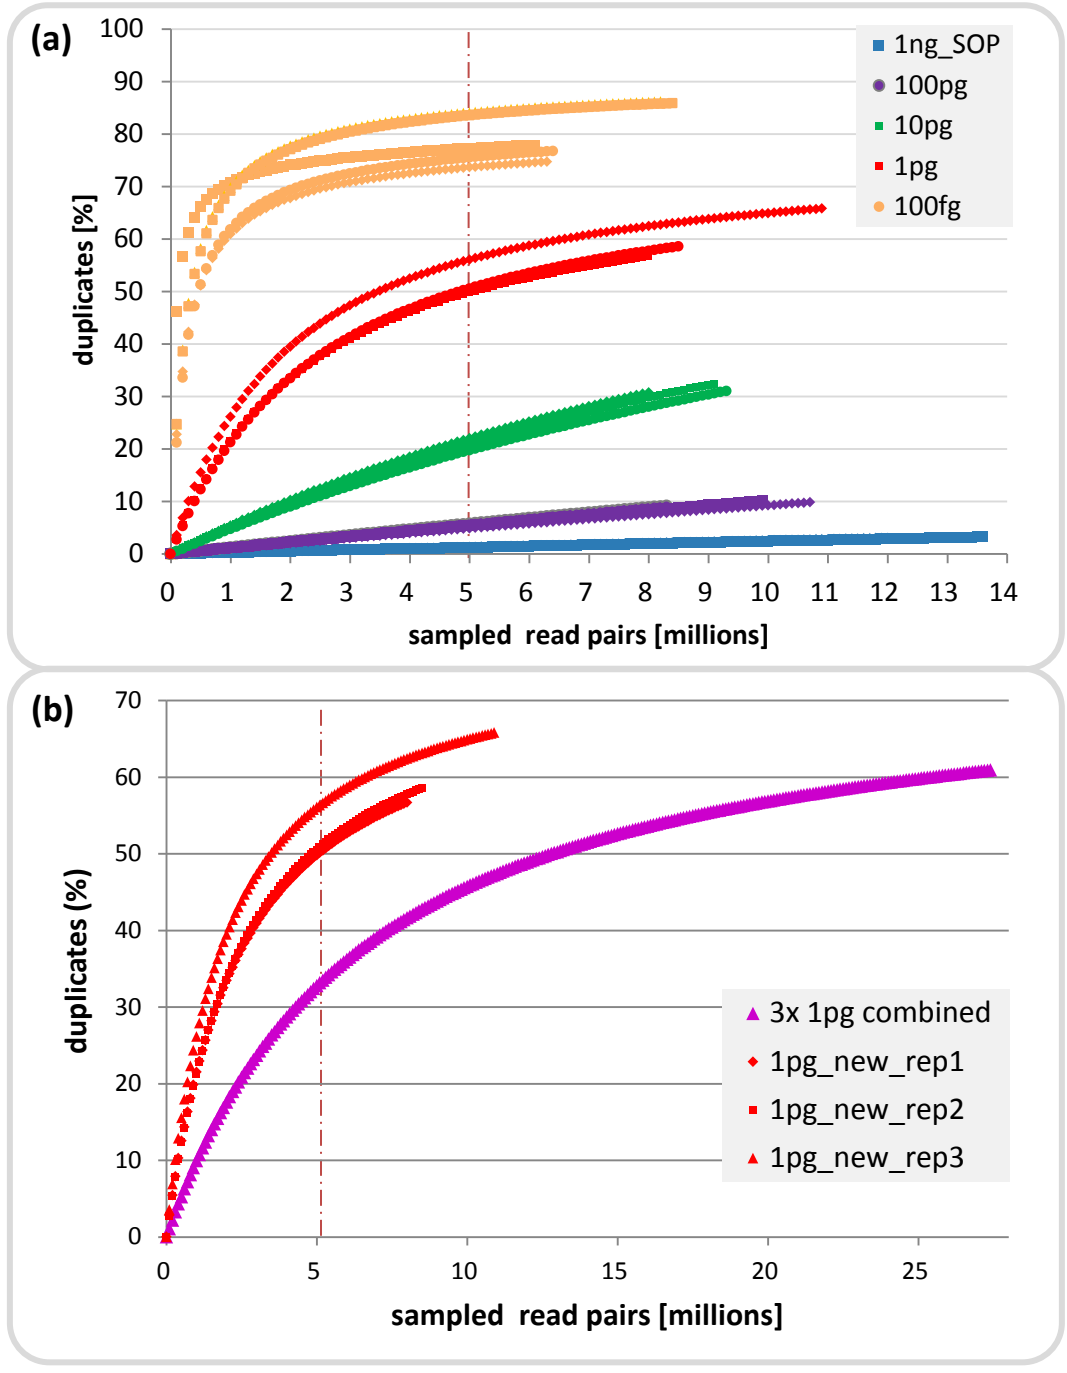

**Figure S7 | PCR read duplicates.** (a) Reads identified as duplicates in the mock community SOP and low input DNA libraries. (b) Observed decrease of read duplicates when combining three replicates of the 1pg libraries. The sequencing depth of 5 million read pairs, used to compare libraries, is accentuated by a dashed line

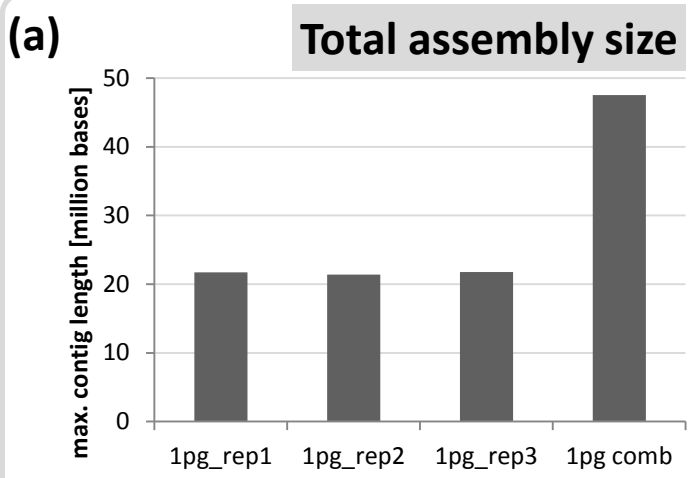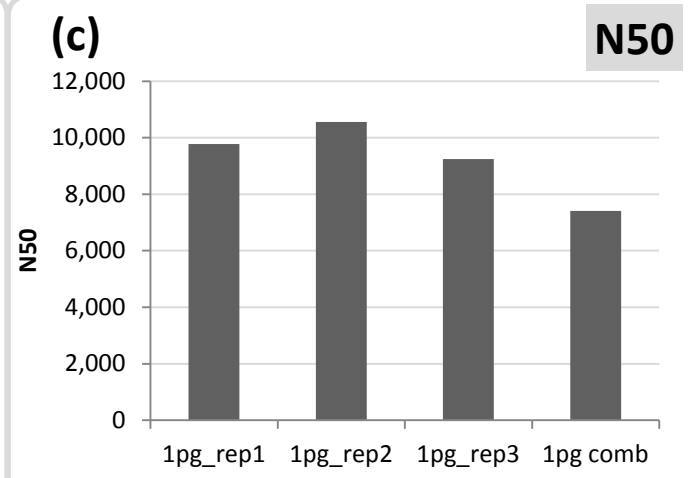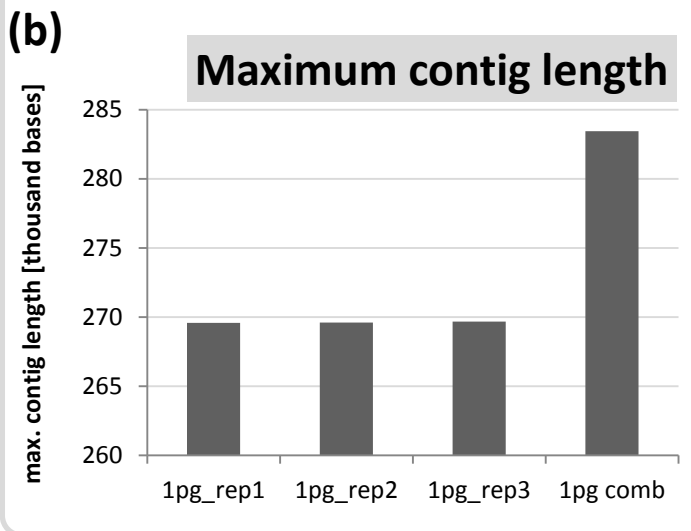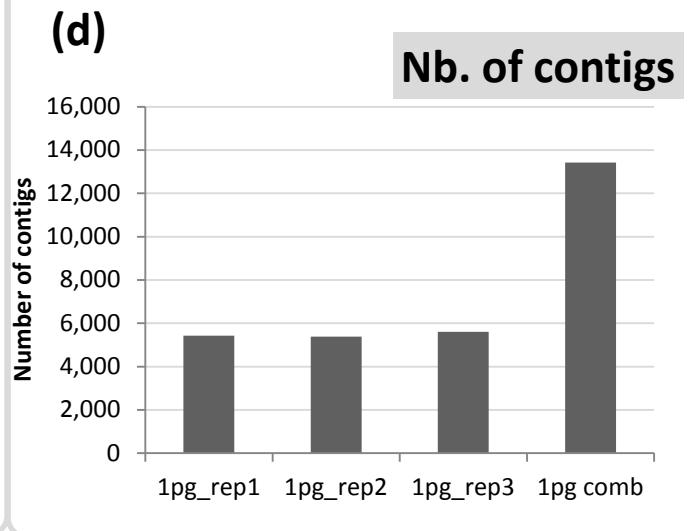

**Figure S8 | Assembly of multiple replicates.** Three replicates from the 1pg low input DNA libraries were assembled separate (rep 1,2,3) and combined (comb). **(a)** Total assembly size, **(b)** Maximum contig length, **(c)** N50 , and **(d)** number of contigs



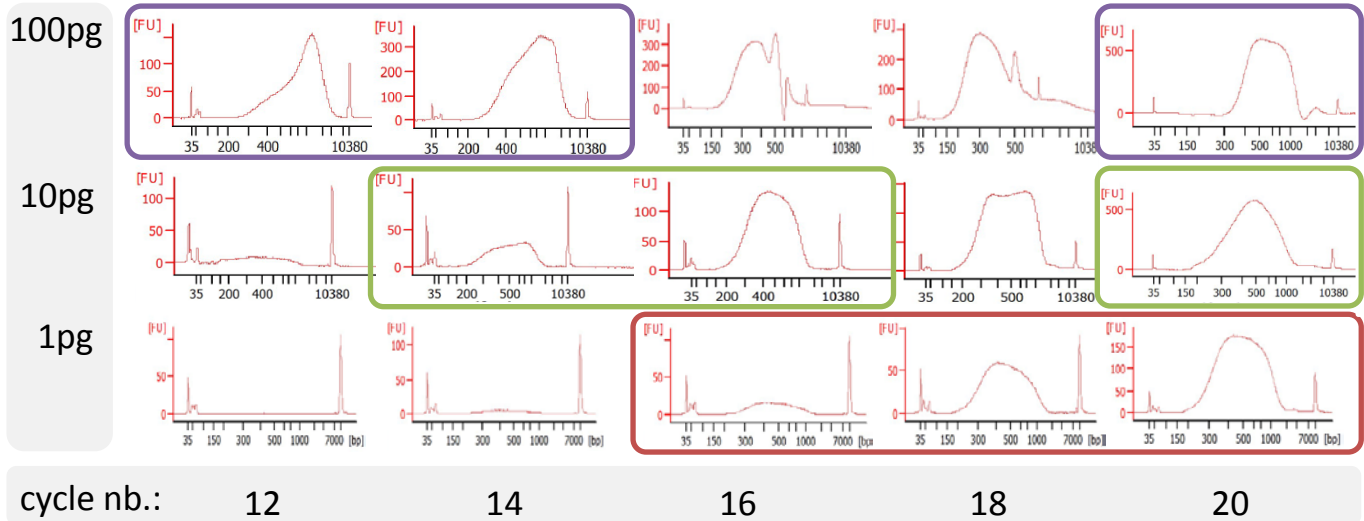

**Figure S9 Bioanalyzer detectability thresholds as a function of limited cycle PCR.** The range of tested limited PCR cycles starts at 12 cycles (as used in the SOP) and increases in two-step intervals to 20 cycles (used in our modified protocol). The Bioanalyzer plots are shown for each tested cycle number using 100pg, 10pg, and 1pg input DNA. The coloured boxes indicate the libraries above the Bioanalyzer detectability thresholds, which were selected for sequencing. ATM dilutions of 1:10 were used for all libraries.

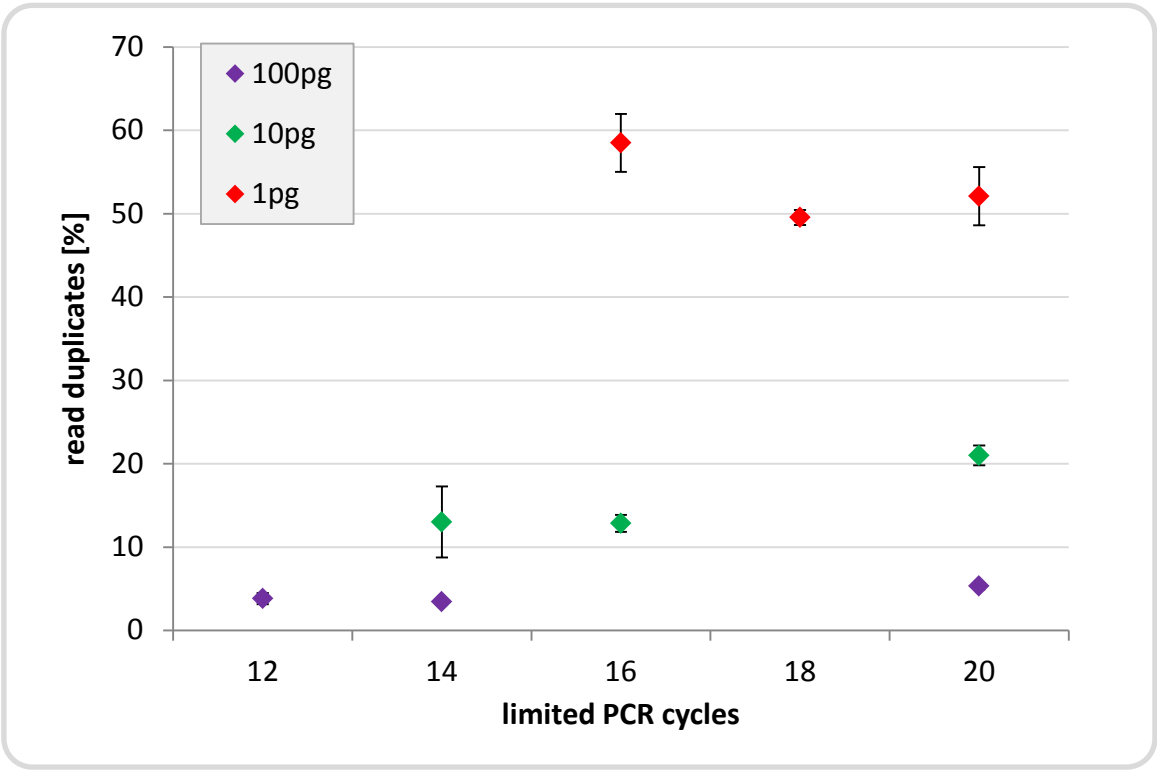

**Figure S10 | Read duplicates and limited PCR cycles.** The relation between the percent of read duplicates (y-axes) and the number PCR cycles (x-axes) reveals no decrease of read duplicates with lower cycle numbers.

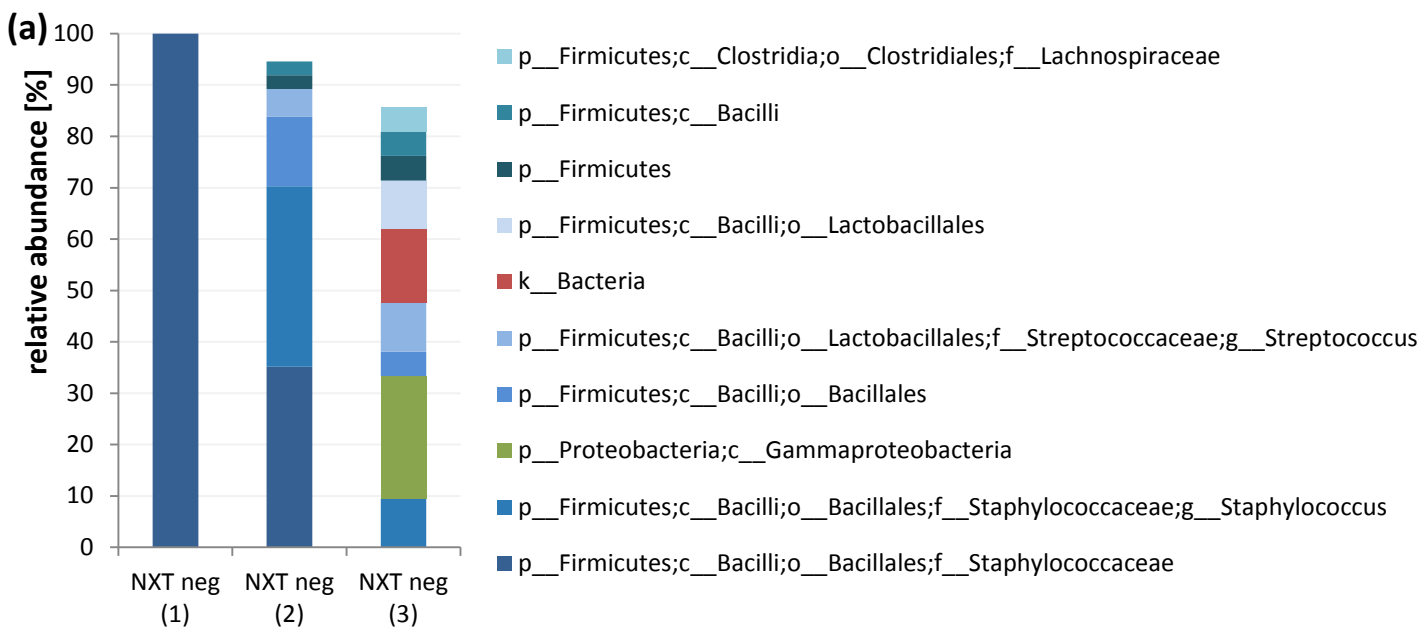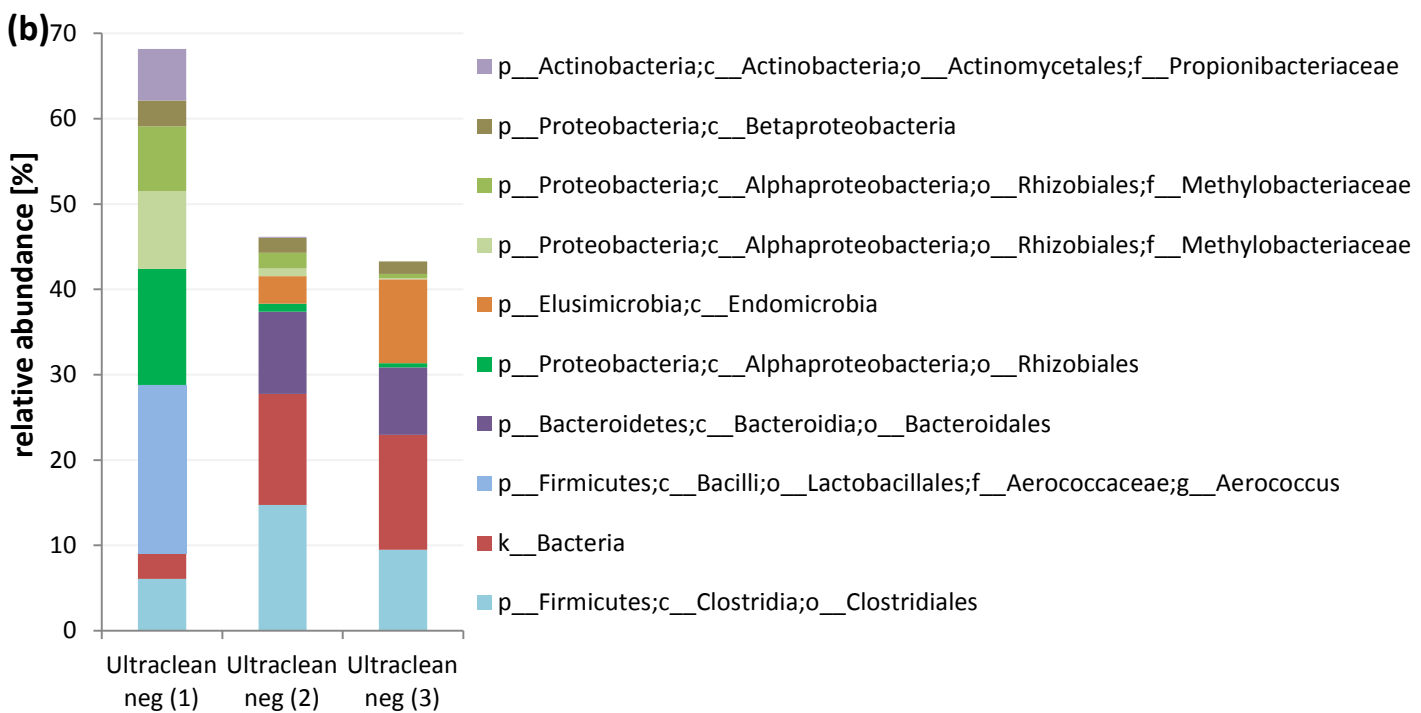

**Figure S11 | Taxonomic profile of unassigned reads.** Unmapped reads not mapping to our reference database which includes the mock community, human, phiX and *Methylobacterium aerolatum*, as shown in Figure 2, were profiled via short read aligner graftM utilizing the 16S rRNA package. **(a)** Taxonomic profile of unmapped Nextera XT negative controls (NXT neg) replicates, showing top ten hits, **(b)** taxonomic profile of top ten hits of DNA extraction plus Nextera XT negative controls (Ultraclean neg) replicates.) Please note that the color schemes are different between the graphs.

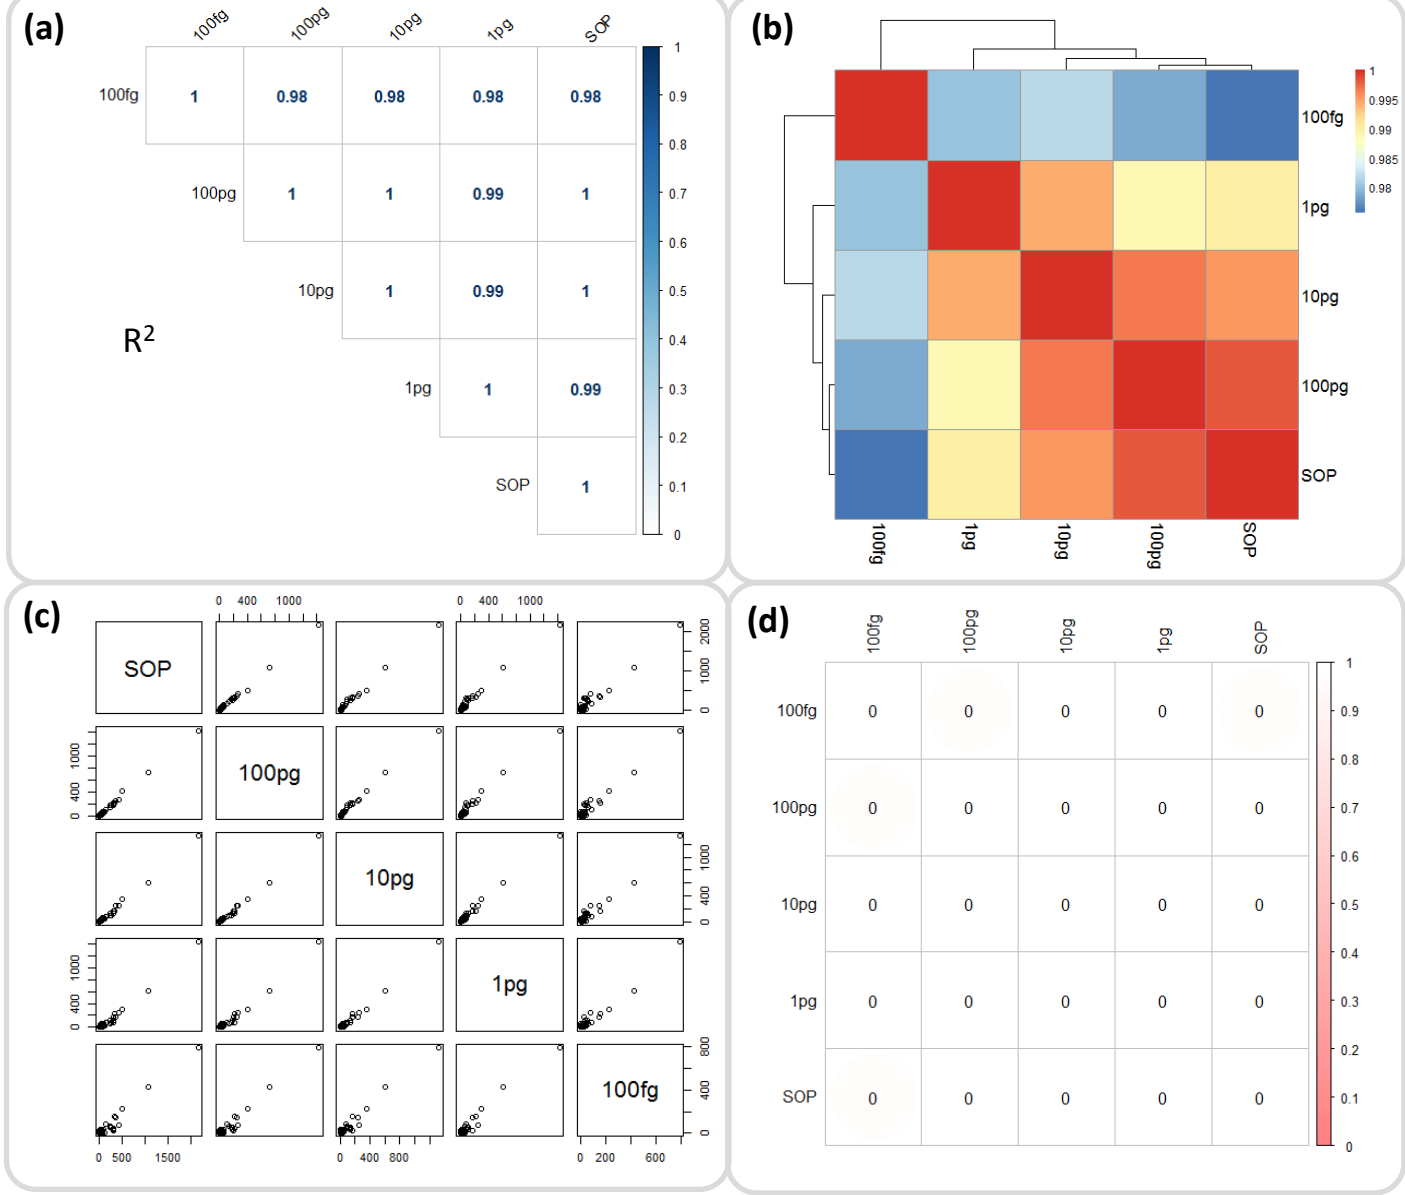

**Figure S12 | Mock community 16S rRNA-based taxonomic profiles.** Correlations are shown for the SOP and the low input DNA libraries. **(a)** Pearson correlation coefficient ( $R^2$ ), **(b)** correlation matrix, **(c)** correlation plot, and **(d)** significance test of the observed correlations. The applied cut-off was a maximum >10 reads per OTU.

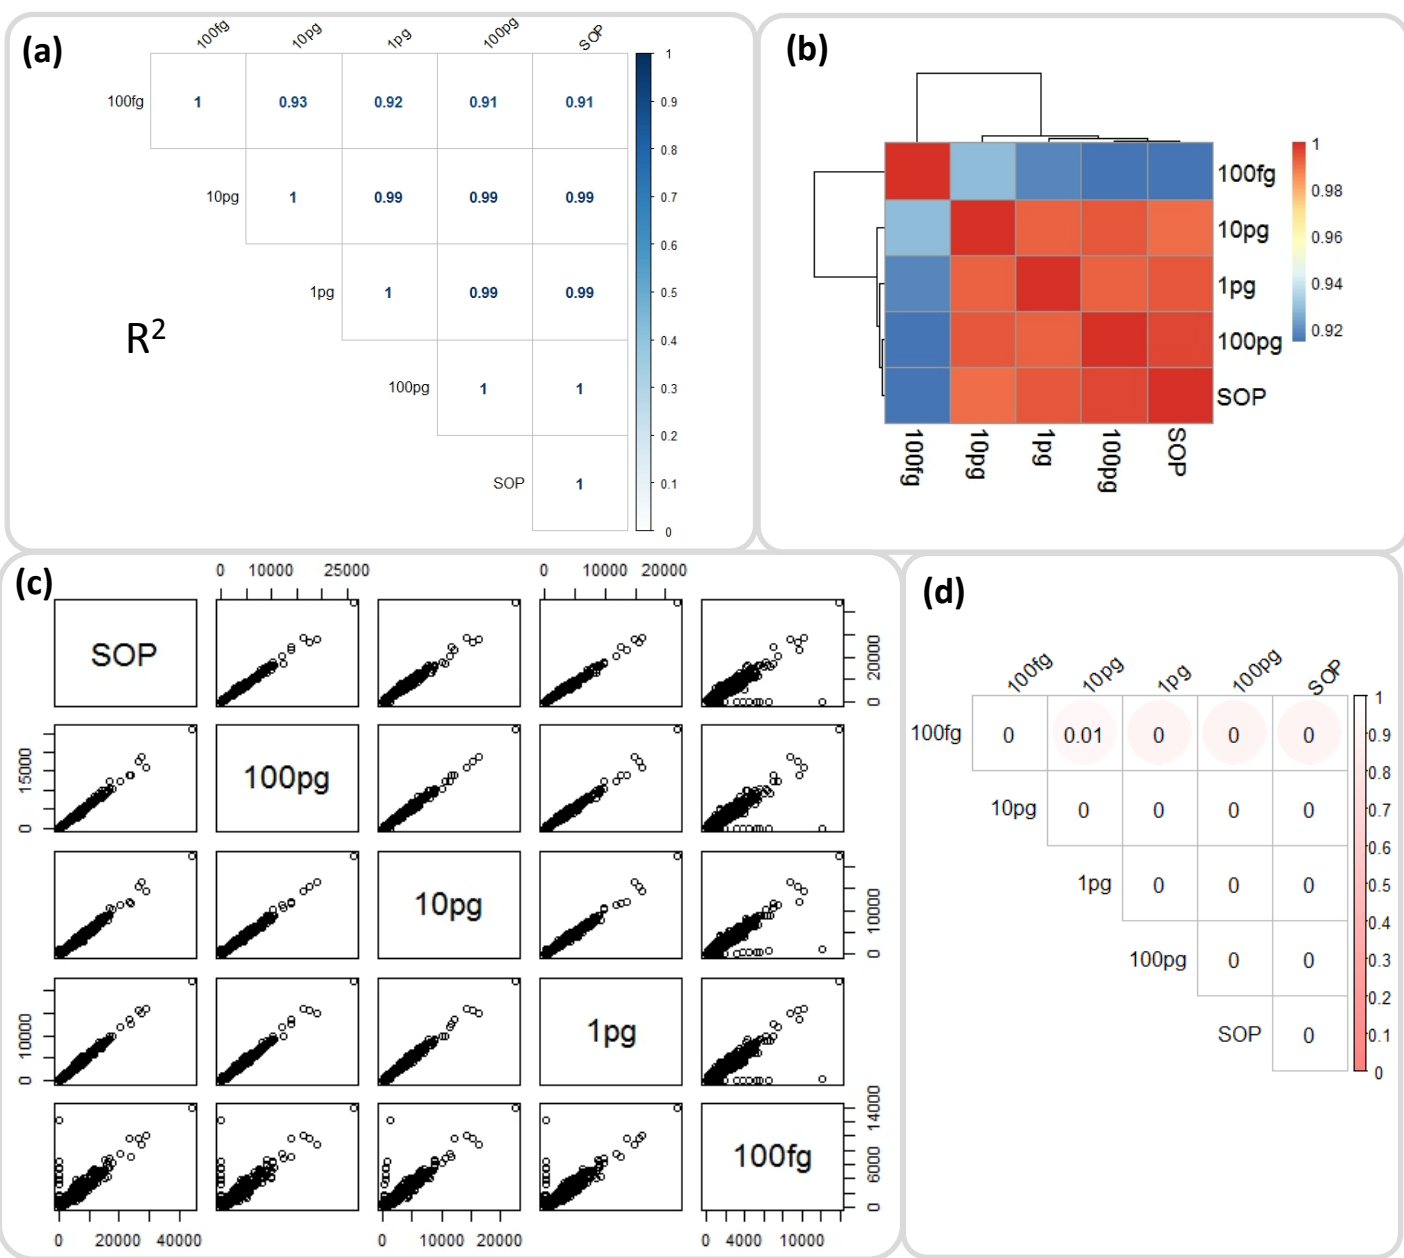

**Figure S13 | Functional profile analysis.** Correlations are shown for the SOP and the low input DNA libraries. **(a)** Pearson correlation coefficient ( $R^2$ ), **(b)** correlation matrix, **(c)** correlation plot, and **(d)** significance test of the observed correlations. Reads were aligned with DIAMOND (BLAST X mode) against the KO (KEGG Orthology) database and a cut-off maximum >500 was applied to the resulting output table.

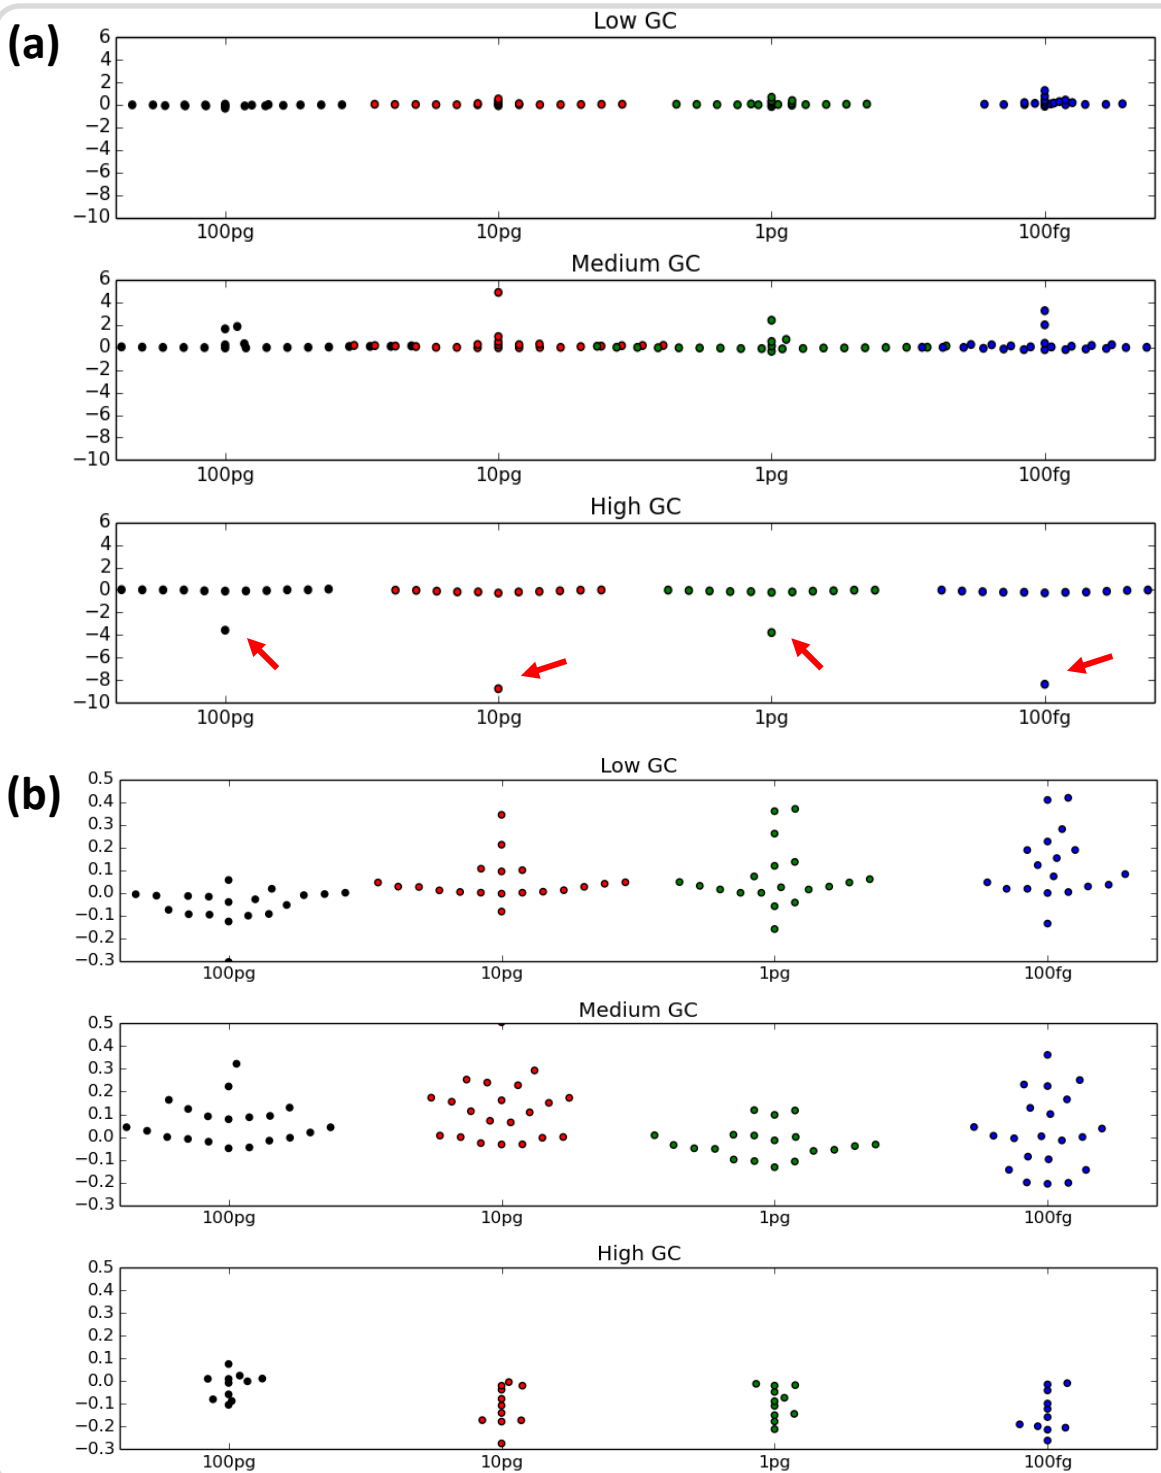

**Figure S14 | Differences in relative abundance of the low DNA libraries to the 1ng SOP library, grouped by GC content.** Each data point represents the average GC content of a mock community member, whereby the organisms are grouped in three categories: Low GC (<40% GC; top graph), medium GC (41-60% GC; middle graph), high GC (>61% GC, bottom graph). (a) All 54 mock community members were included. The strongest outlier was found in the High GC group (-4 to -8%; red arrows) and was identified as *Burkholderia sp.* (67% GC), the second most abundant member in our mock community. (b) Organisms producing outliers above +/- 1% were not included. The Y-axis shows the differences in relative abundance, based on read mapping, of the mock community members by comparing the low input libraries to the 1ng SOP.

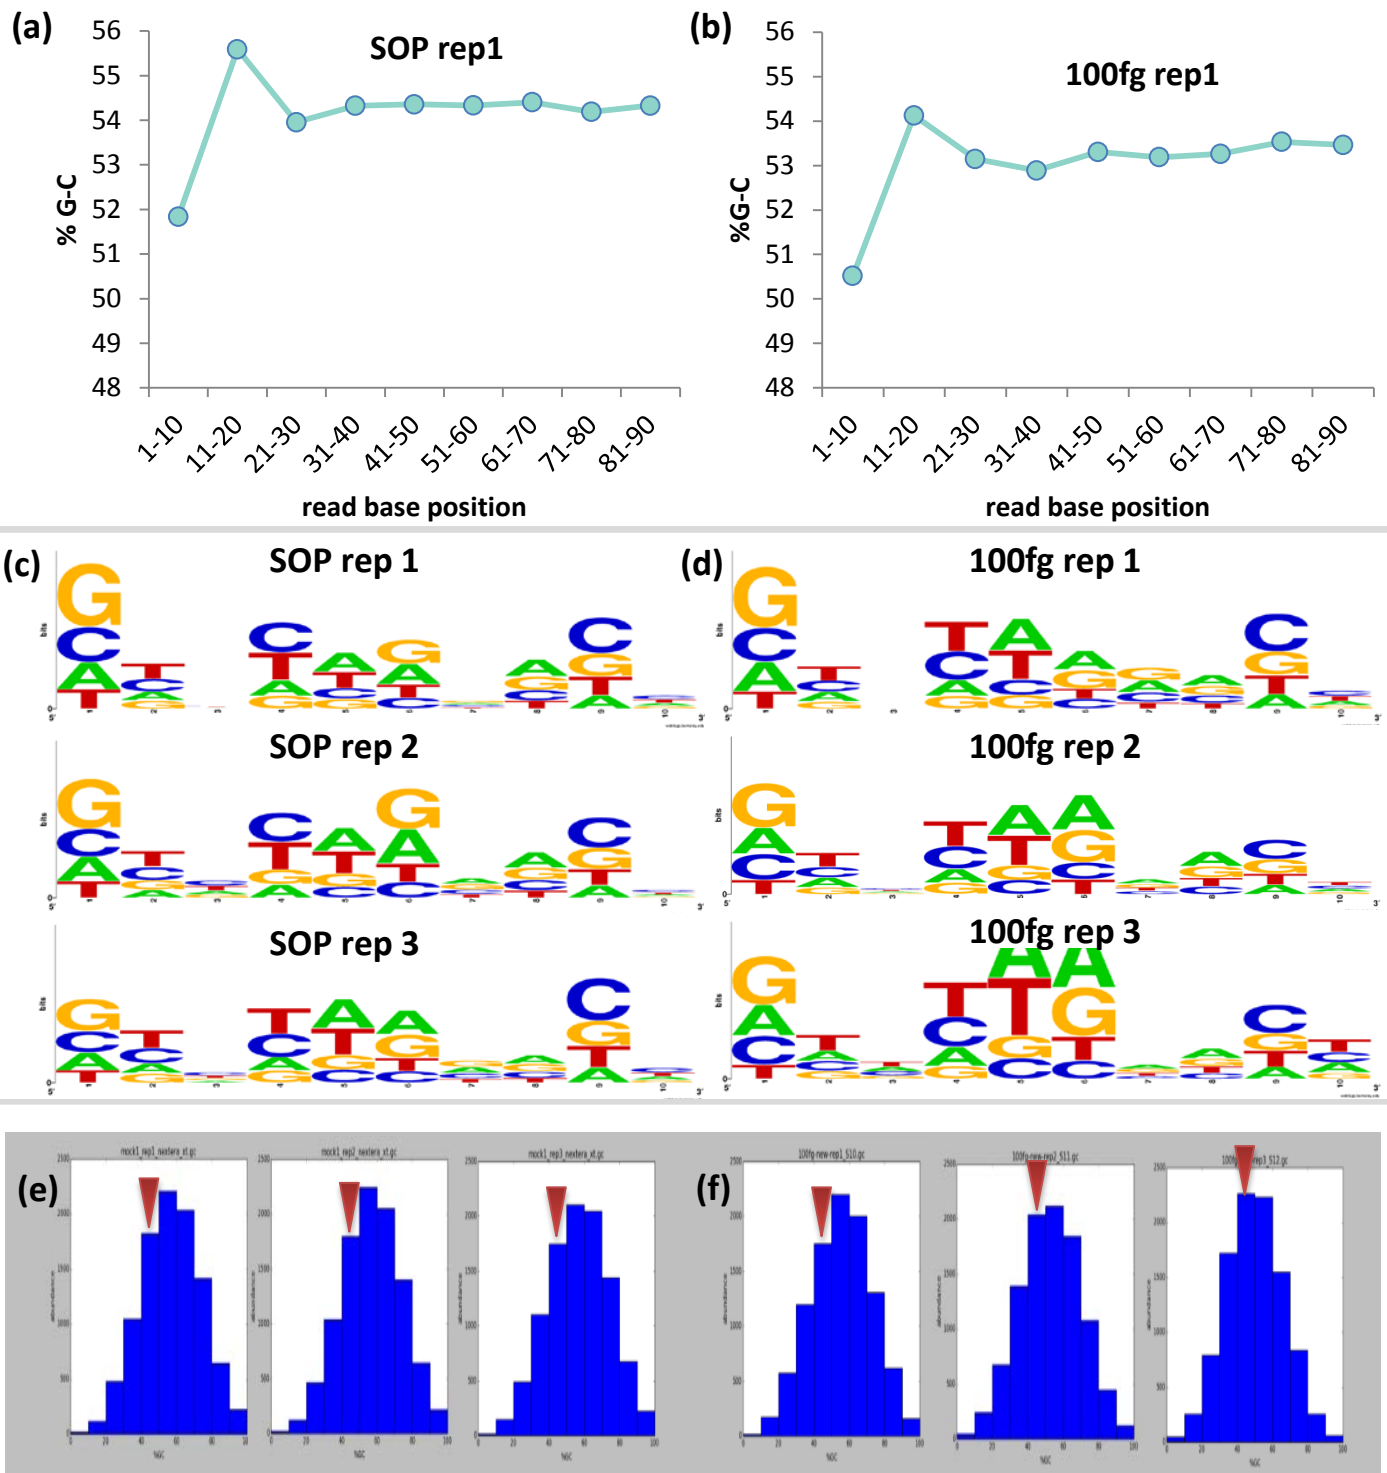

**Figure S15 | Transposase insertion sites.** Average GC content for reads of **(a)** a 1ng SOP and **(b)** a 100fg low input library. Reads were randomly subsampled to 10,000 and the average %GC was analyzed in 10 base segments from the start of the read to base position 90. Sequence logo analysis of **(c)** 1ng SOP and **(d)** 100fg low input libraries. The first 10 bases of a random subset of 1000 reads were analysed, showing a slight preference for insertion sites starting with Guanine (G). Each logo consists of stacks of symbols, one stack for each position in the sequence. The overall height of the stack indicates the sequence conservation at that position, while the height of symbols within the stack indicates the relative frequency of each amino or nucleic acid at that position. The even heights of the symbols indicate that the distribution is near random on most position. However the minute differences can be used to extract the consensus target site for the SOP libraries which is GTNYARRACN, and for the 100fg libraries which is GTNTAARACN showing a slightly higher AT frequency. The GC content of transposase insertion sites of **(e)** 1ng SOP and **(f)** 100fg low input libraries. The first 10 bases of a random subset of 1000 reads were analyzed for library replicates. Note the GC category 40-60 %GC (red triangle) is more pronounced in some of the 100fg input libraries.

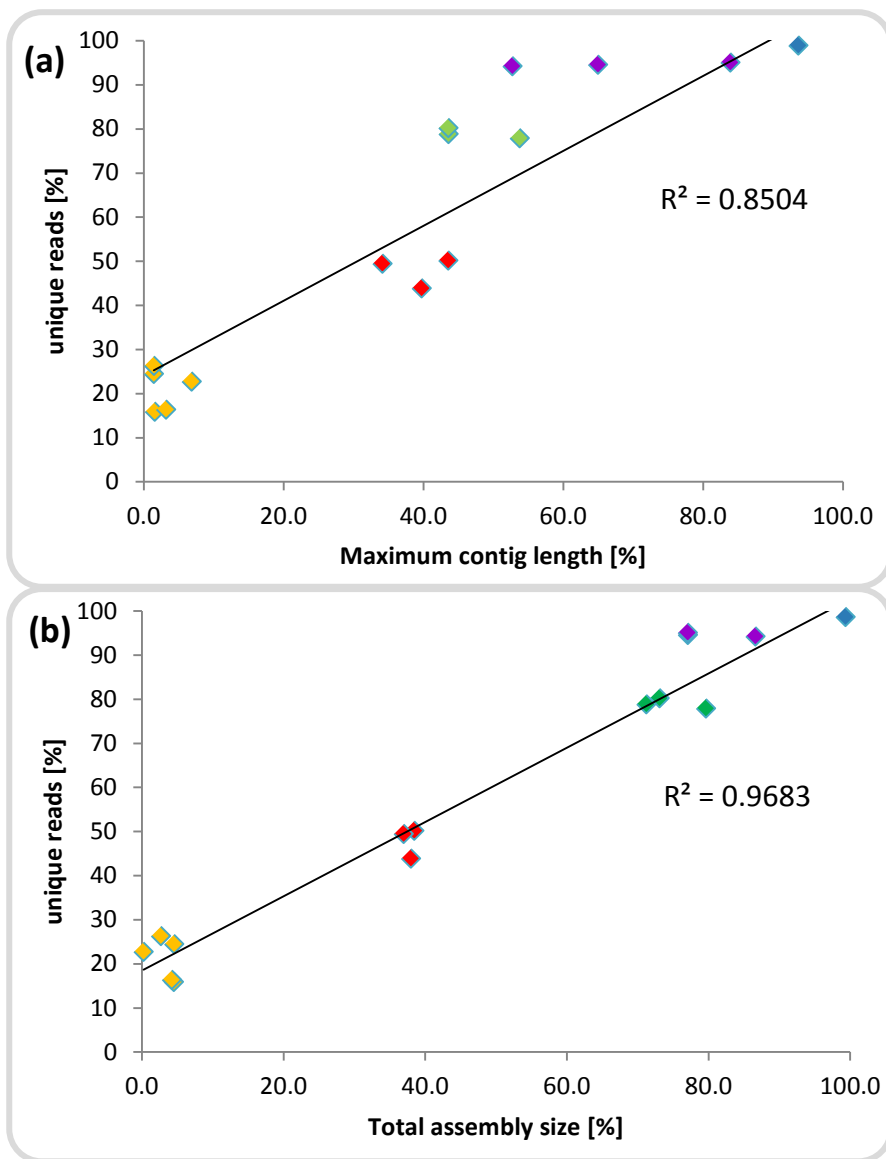

**Figure S16 | Correlations between the percentage of unique reads and assembly statistics.** (a) Maximum contig size, (b) total assembly size. Read files were subsample to 5 million reads pairs prior assembly and only contigs  $\geq 1\text{kb}$  were included in the analysis. The Pearson correlation coefficient and a linear trend line is given for each correlation.



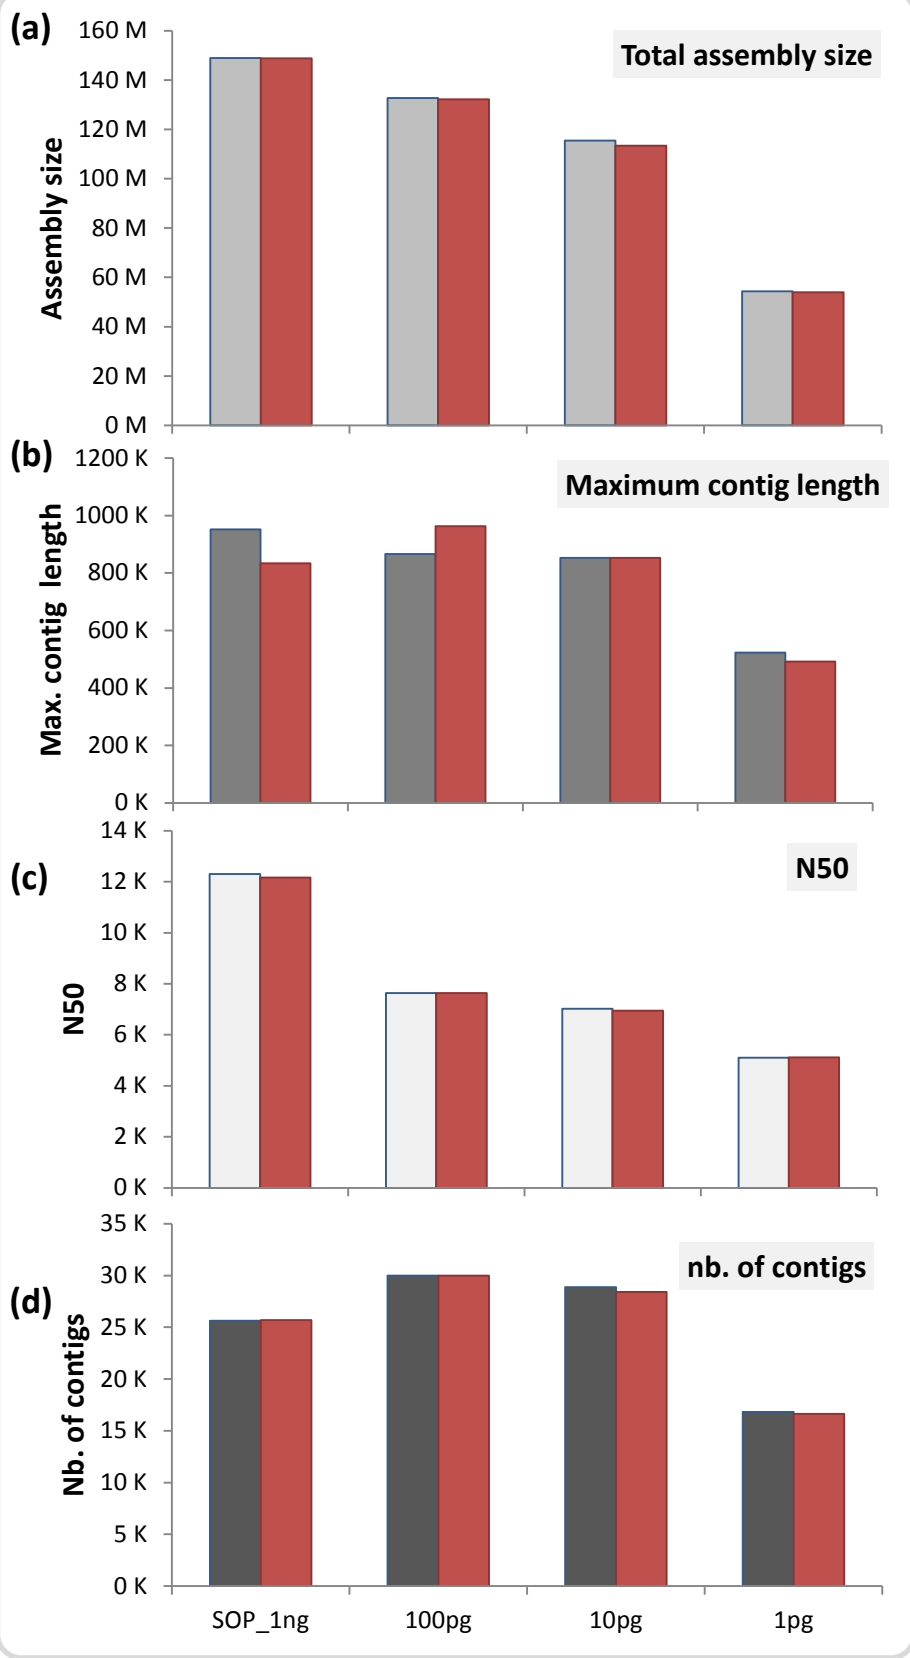

**Figure S17 | Mock community assembly statistics utilizing 50 million reads.** (a) Maximum contig size, (b) total assembly size, (c) number of contigs, and (d) N50 of the SOP and low input mock community libraries. The assembly statistics is shown for all reads (gray shaded bars) and without read duplicates (red bars). Read files were subsample to 50 million reads. Only contigs  $\geq 1\text{kb}$  were included in the analysis.

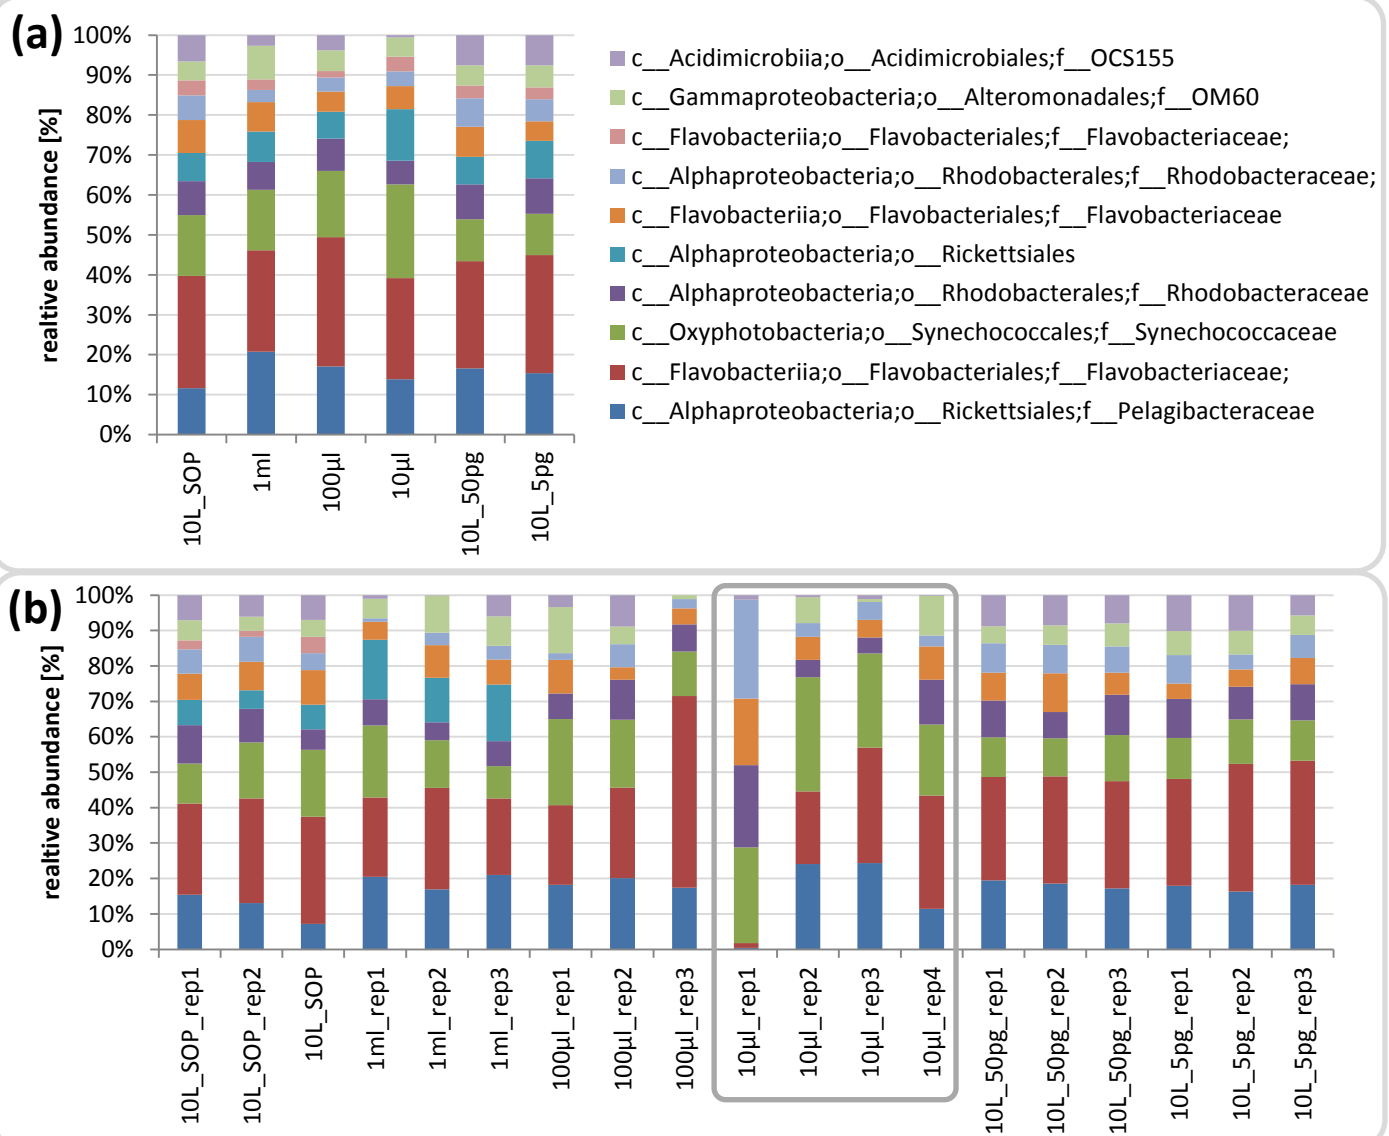

**Figure S18 | Relative abundance profiles of marine microbial samples.** Bacterial OTUs were assigned based on 16S rRNA gene sequence detection of shotgun sequencing reads (graftM; see Methods). The relative abundance is shown comparing the 10 most abundant OTUs. Plastid sequences belonging to microbial eukaryotes and the contaminant *Methylobacterium* were not included in the analysis. (a) Average number of reads per OTU for each sample type, (b) number of reads per OTU for each replicate. Note the increased variation among replicates of the 10µl sample (dark gray box).

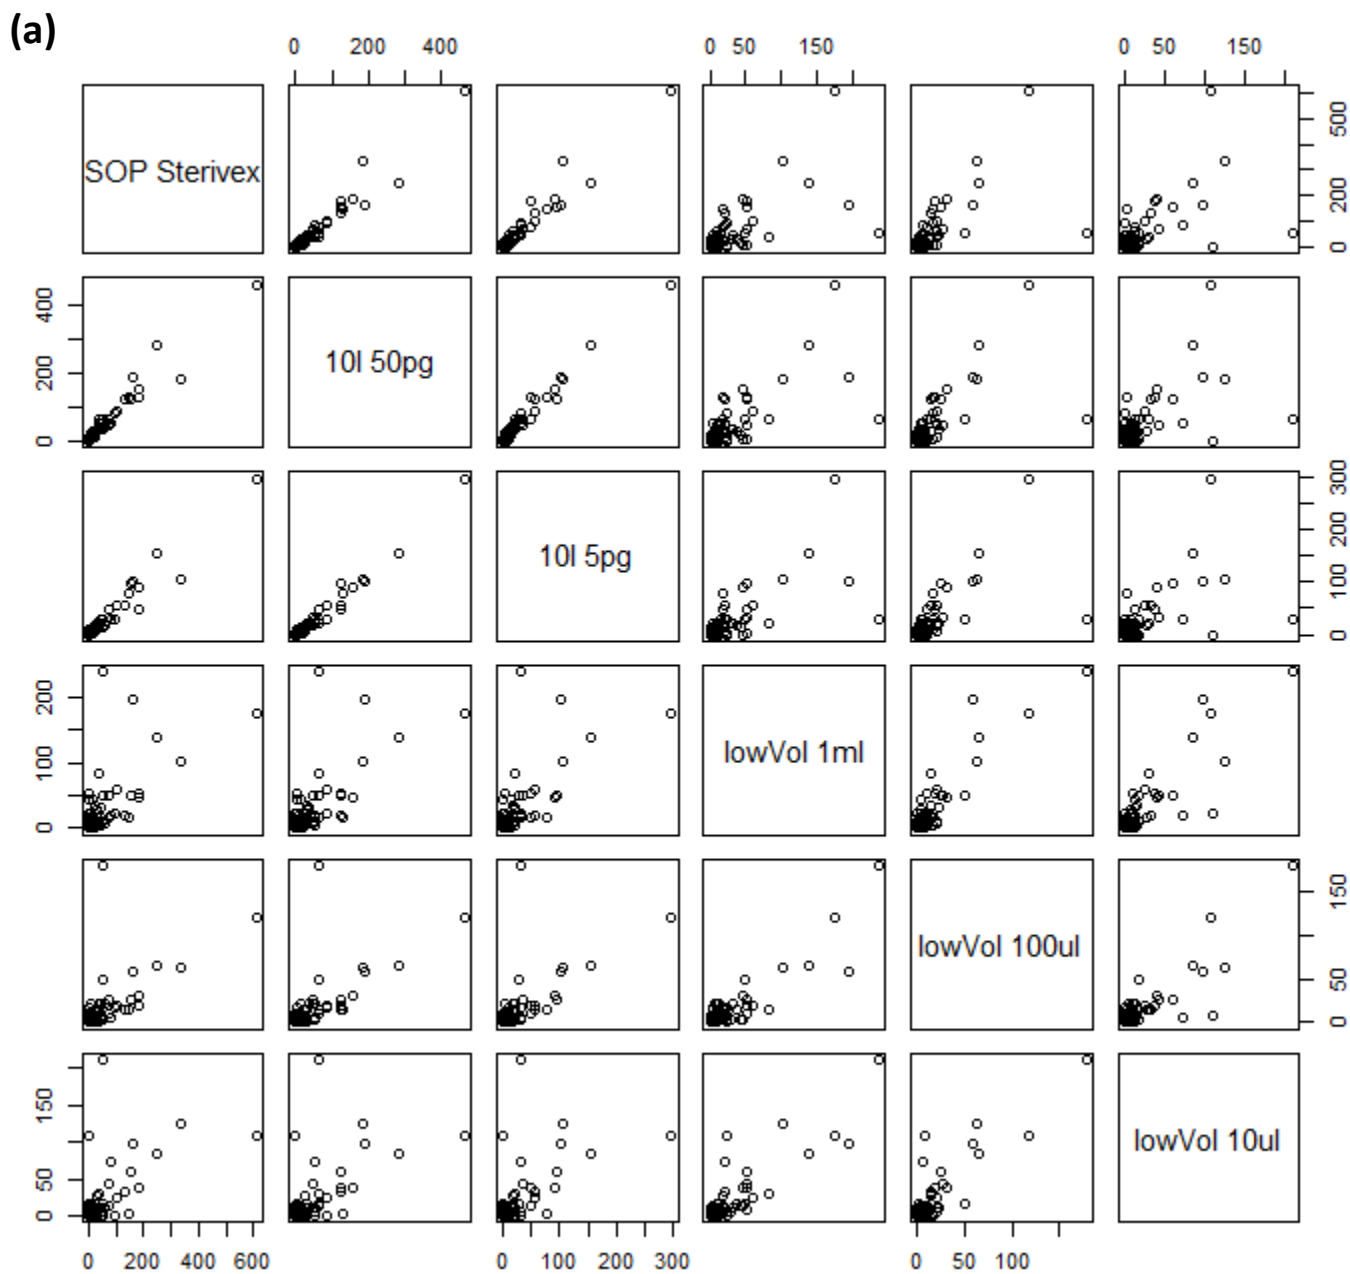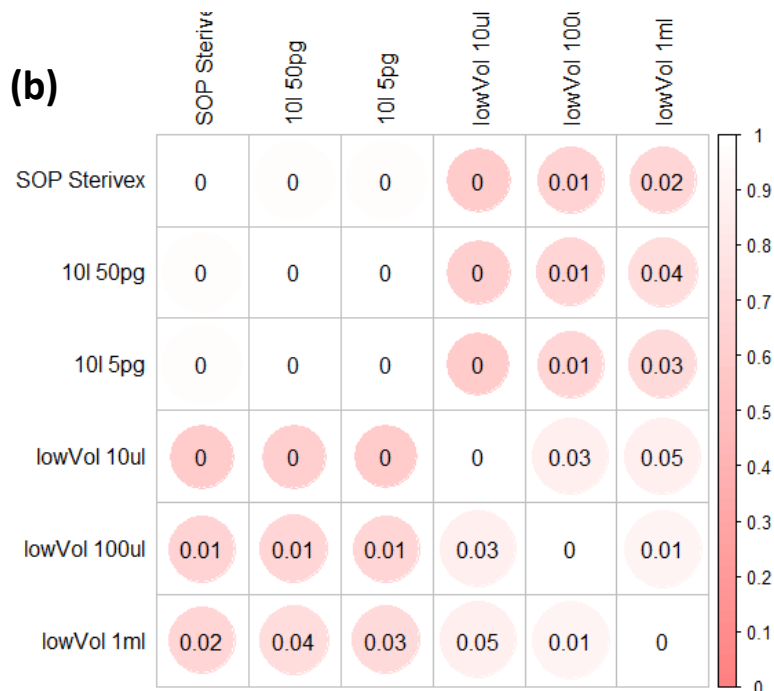

**Figure S19 | 16S rRNA gene based profile analyses of marine samples. (a) Correlation plots, (b) significance tests for the marine SOP, the low volume filter dilution, and the low input DNA libraries.**

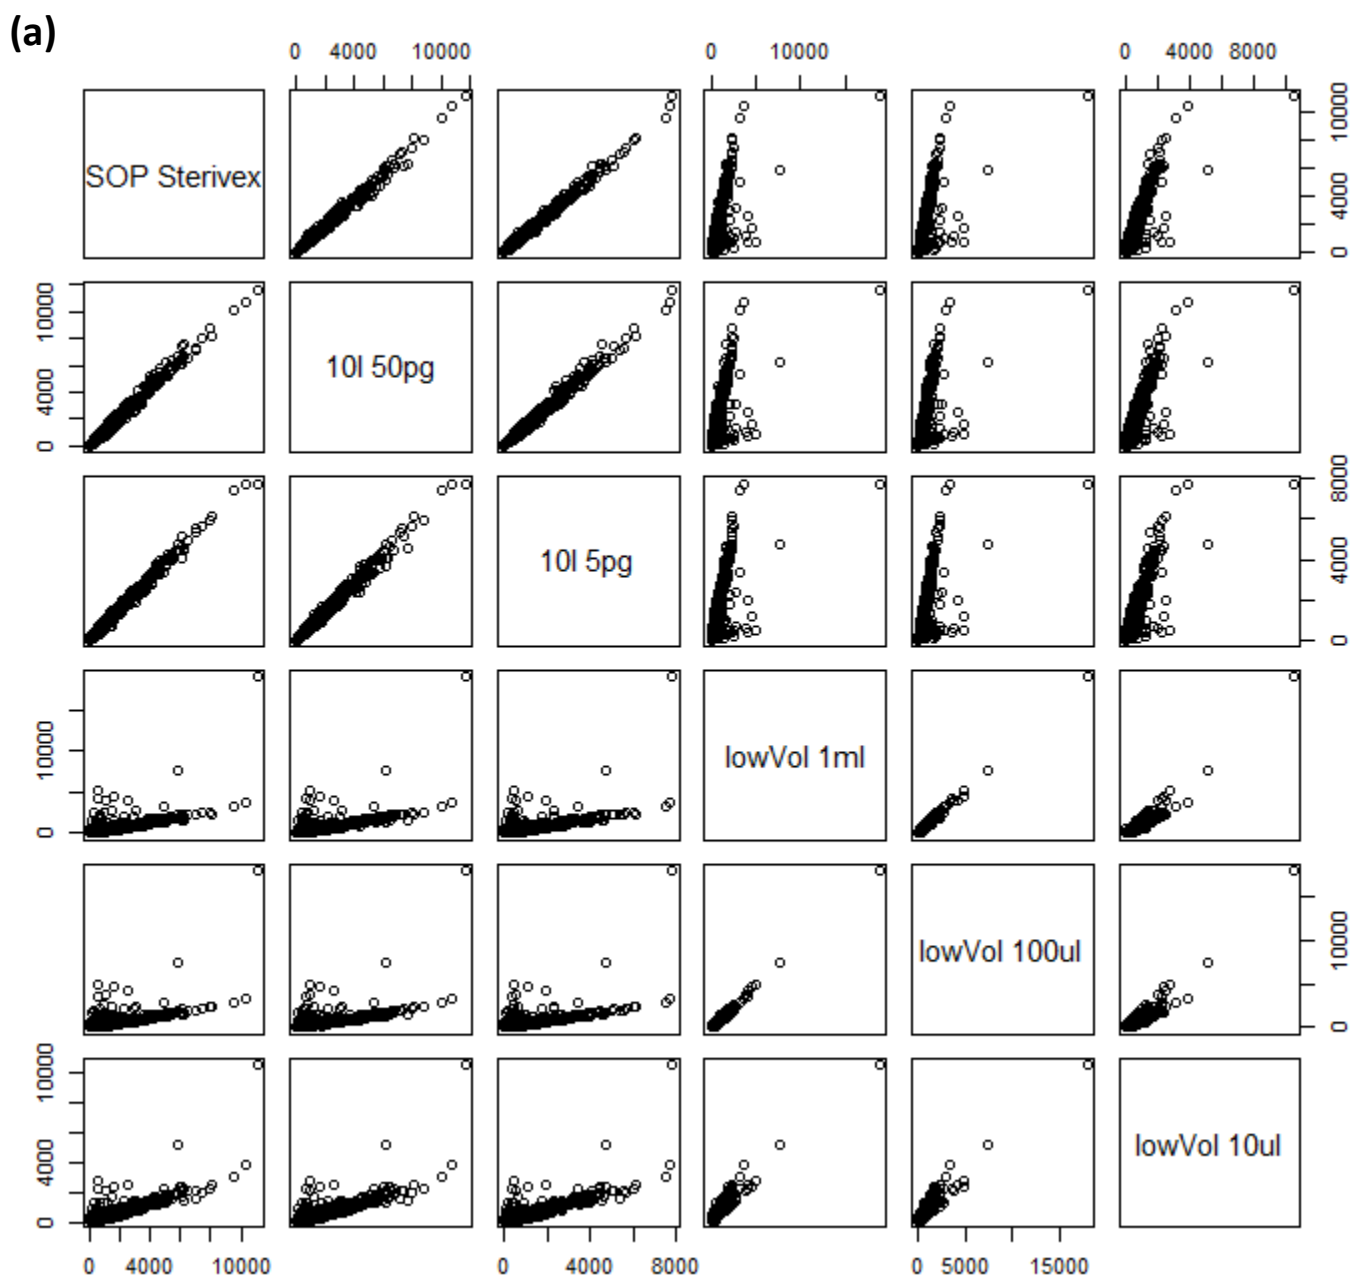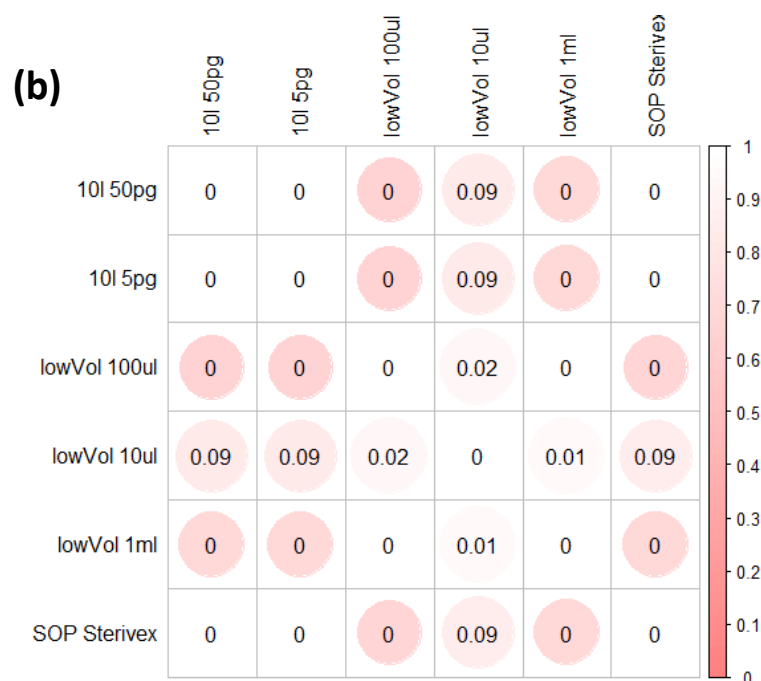

**Figure S20 | KO-based functional profile analyses of marine samples.** (a) Correlation plots, (b) significance tests for the marine SOP, the low volume filter dilution, and the low input DNA libraries. Per definition, a p-value <0.05 indicates that the correlation is significant.

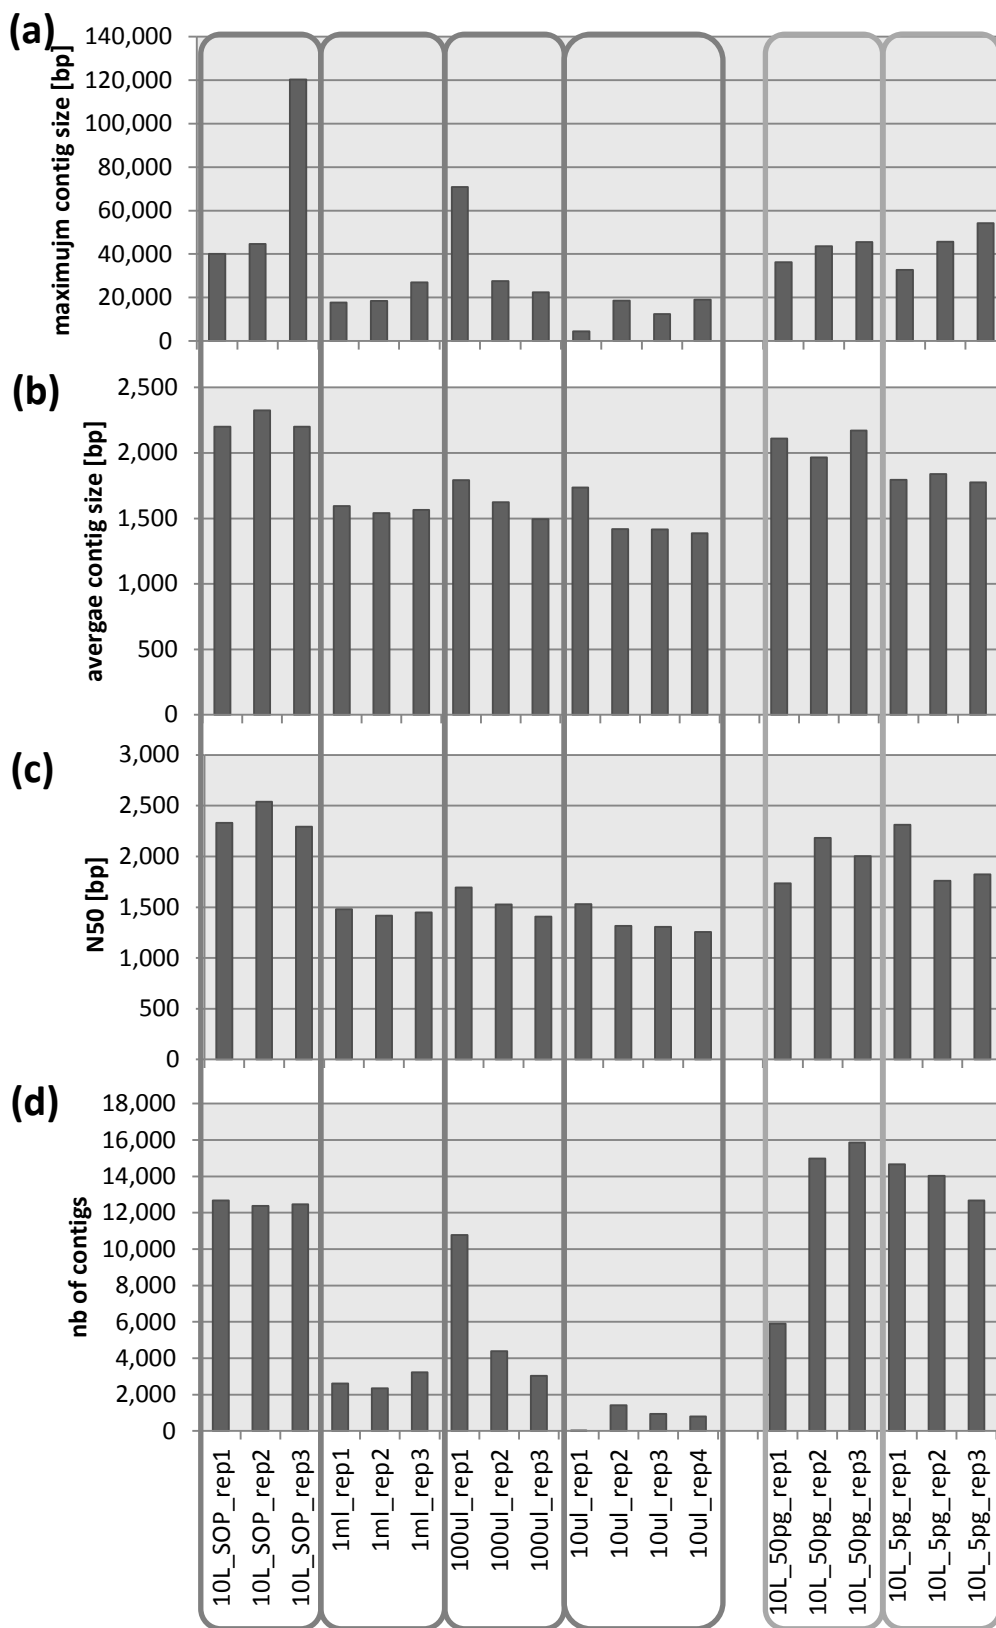

**Figure S21 | Marine surface sample assembly statistics. (a)** Maximum contig size, **(b)** average contig size, **(c)** N50 and **(d)** N number of contigs of the SOP and low input mock community libraries. Read files were subsample to 5 million read pairs.. Only contigs  $\geq 1$ kb were included in the analysis.
